1

2

3 CIGB-300 synthetic peptide, an antagonist of CK2 kinase activity, as a treatment for  
4 Covid-19. A computational biology approach

5

6

7

8 Jamilet Miranda<sup>1\*</sup>, Ricardo Bringas<sup>1</sup>, Jorge Fernández-de-Cossio<sup>1</sup> and Yasser Perera<sup>2,3</sup>

9

10

11 <sup>1</sup>Department of Bioinformatics, Division of Informatics, Center for Genetic Engineering and Biotechnology,  
12 Havana, Cuba

13 <sup>2</sup>Laboratory of Molecular Oncology, Department of Pharmaceuticals, Division of Biomedical Research,  
14 Center for Genetic Engineering and Biotechnology, Havana, Cuba

15 <sup>3</sup>China-Cuba Biotechnology Joint Innovation Center, Yongzhou Zhong Gu Biotechnology Co., Yongzhou,  
16 Hunan, People Republic of China

17

18 \*Corresponding author

19 E-mail: [jamilet.miranda@cigb.edu.cu](mailto:jamilet.miranda@cigb.edu.cu) (JM)

20

## 21 **Abstract**

22 Drug repositioning became the first choice for treating Covid-19 patients due to the  
23 urgent need to deal with the pandemic. Similarities in the hijacking mechanisms used by  
24 SARS-CoV-2 and several type of cancer, suggest the repurposing of cancer drugs to  
25 treat Covid-19. CK2 kinase antagonists have been proposed for the treatment of  
26 cancer. A recent study in cells infected with SARS-CoV-2 virus found a significant CK2  
27 kinase activity, and the use of a CK2 inhibitor showed antiviral responses. CIGB-300,  
28 originally designed as an anticancer peptide, is an antagonist of CK2 kinase activity that  
29 binds to CK2 phospho-acceptor sites. Recent preliminary results show an antiviral  
30 activity of CIGB-300 versus a surrogate model of coronavirus. Here we present a  
31 computational biology study that provides evidences at the molecular level of how  
32 CIGB-300 might interfere with SARS-CoV-2 life cycle inside infected human cells. First,  
33 from SARS-CoV studies, we infer the potential incidence of CIGB-300 in SARS-CoV-2  
34 interference on immune response. Next, from the analysis of multiple Omics data, we  
35 propose the action of CIGB-300 since early stage of viral infections perturbing the virus  
36 hijacking of RNA splicing machinery. It was also predicted the interference of CIGB-300  
37 in virus-host interactions responsible for the high infectivity and the particular immune  
38 response to SARS-CoV-2 infection. Further, we provide evidences of CIGB-300  
39 attenuation of phenotypes related to muscle, bleeding, coagulation and respiratory  
40 disorders.

41

42

## 43 Introduction

44 SARS-CoV-2 currently spread world-wide showing high infectivity and transmissibility.  
45 Due to the urgency of finding effective therapeutics treatments in the shortest possible  
46 time, drug repurposing emerged as the first option [1,2]. The huge amount of data so far  
47 generated permit the re-consideration of drugs already evaluated for other diseases,  
48 which might have advanced toxicological, preclinical and/or clinical studies.

49 Since the genomic sequence of SARS-CoV-2 was made available in January 2020 [3],  
50 diversity of technique and laboratory models has been profusely applied to the study of  
51 SARS-CoV-2 replication and infectivity.

52 Blanco-Mello et al. [4] performed RNA-seq experiments from polyA RNAs isolated from  
53 infected cells. They found a diminished transcriptional response of type I/III interferon-  
54 induced genes and, concurrently, a significant increase of chemokines and IL6, which  
55 ground their suggestion to evaluate FDA-approved drugs with immunomodulating  
56 properties that could be rapidly implemented in clinical protocols.

57 Various mass-spectrometry studies made important contribution to the comprehension  
58 of SARS-CoV-2 life cycle. Gordon et al. [5] using affinity-purification mass spectrometry  
59 (AP-MS) identified the sets of human proteins that physically interact with each of 26  
60 viral proteins that they previously individually cloned in human cells derived from kidney  
61 HEK-293T/17. A total of 332 physical interactions between SARS-CoV-2 and human  
62 proteins were identified. When the expressions of all interacting human proteins in 29  
63 different tissues were analyzed, lung was identified as the one with the highest  
64 expression levels. GO enrichment analysis was performed to the set of human

65 interactors of each viral protein cloned. For each of the 26 sets, the major  
66 overrepresented biological processes included Nuclear Transport, Ribonucleoprotein  
67 Complex Biogenesis and Cellular Component Disassembly. Host proteins involved in  
68 innate immune response were targeted by viral proteins nsp13, nsp15 and orf9b while  
69 proteins from the Nf-kB pathway were targeted by nsp13 and orf9c. The most relevant  
70 host proteins targeted by known drugs were identified from this analysis. Next, they  
71 demonstrated the capacity of some of these drugs to reduce viral infectivity. The study  
72 of Gordon et al. [5] is of outstanding relevance for the understanding of the mechanism  
73 used by SARS-CoV-2 to improve its infectivity and to avoid a strong immune response.  
74 It also provides valuable information for repurposing of existing drugs.

75 The role of kinases in the course of viral infection was addressed by Bouhaddou et al.  
76 [6], who carried a quantitative mass spectrometry-based phosphoproteomics study in  
77 Vero E6 cells infected by SARS-CoV-2. Casein kinase II (CK2) and p38 MAP kinases  
78 were significantly activated while mitotic kinases were shutdown. A relevant role of CK2  
79 in induced filopodia protrusions during viral infection was evidenced in association with  
80 viral capsid protein N. Both CK2 and protein N were co-localized in filopodia protrusions  
81 which were significantly longer and more branched than in control cells. The authors  
82 suggest that N protein may control CK2 activity and regulate cytoskeleton elements in  
83 filopodia. Although the role of CK2 in viral infections is not new, it is remarkable the level  
84 of upregulation of CK2 activity as consequence of SARS-CoV-2 infection [6]. The strong  
85 antiviral activity of Silmitasertib (CX-4945), a CK2 inhibitor, suggests this kinase as an  
86 attractive target for treating Covid-19 patients. Ongoing clinical trial of CX-4945 is

87 evaluating its clinical benefits and anti-viral activities in moderate COVID-19 patients  
88 (<https://clinicaltrials.gov/ct2/show/study/NCT04663737>).

89 CIGB-300 is a synthetic peptide designed to bind the phospho-acceptor motif of CK2  
90 substrates, interfering the phosphorylation of serine/threonine residues by CK2. Clinical  
91 use of CIGB-300 have confirmed it safety and tolerability when administered  
92 intravenously showing clinical efficacy in cancer patients [7,8].

93 In a phosphoproteomic experiment in NCI-H125 cells, Perera et al. [9] identified CK2  
94 phospho-acceptors peptides that are significantly inhibited by CIGB-300. They found for  
95 the first time, that CIGB-300 binds CK2 $\alpha$  subunit and impairs CK2 $\alpha$ 2 $\beta$ 2 holoenzyme  
96 enzymatic activity. By contrast, phosphorylation of CK2 $\beta$  subunit, which contains itself a  
97 consensus CK2 phosphorylation motif, was not influenced by CIGB-300. Additionally,  
98 Perera et al. [10] identified nucleophosmin (B23) as a major target of CIGB-300. Of  
99 note, Nouri et al. [11] further reported the binding of CIGB-300 to B23 oligomerization  
100 domain. This interaction blocks the association of B23 to Rev and US11 proteins, two  
101 functionally homologous proteins from HIV and HSV viruses respectively. Cells treated  
102 with CIGB-300 showed a significant reduction of virus production suggesting B23 as an  
103 attractive target for antiviral drugs. Lobaina and Perera [12] also proposed B23 as a  
104 potential target in antiviral therapies.

105 With this background, CIGB-300 was tested for its safety and clinical benefits in Covid-  
106 19 patients in a phase I/II clinical trial [13]. It reduced the number of pulmonary lesions  
107 among treated individuals. Additionally, CIGB-300 antiviral effect on MDBK cell infected  
108 with bovine coronavirus (BCoV) Mebus was explored [14]. CIGB-300 inhibited the

109 cytopathic effect and reduced the viral protein accumulation in the cytoplasm. Physical  
110 interaction of CIGB-300 with BCoV nucleocapsid protein(N) was also revealed.  
111 Functional enrichment found cytoskeleton reorganization and protein folding as the  
112 major disturbed biological processes.

113 Here we present an *in silico* analysis of SARS-CoV and SARS-CoV-2 viral infection. We  
114 performed a multi-omics integrative analysis of SARS-CoV-2 infection of human cell  
115 lines that combines functional enrichment and network representation. At the level of  
116 phosphorylation sites, we integrated data from four different phosphoproteomics studies  
117 on SARS-Cov-2 infection [6,15-17] and one study on CIGB-300 inhibition of kinase  
118 activity [9]. We identified biological processes and virus activated phosphosites at  
119 different times after viral infection that can be interfered by CIGB-300. Our results are  
120 consistent with the benefits already evidenced of CIGB-300 treatment in Covid-19  
121 patients.

## 122 **Results and Discussion**

### 123 **Inferring the potential effect of CIGB-300 treatment on SARS-** 124 **CoV-2 virus infection based in previous results.**

#### 125 **CIGB-300 could alter N-protein localization and its RNA binding** 126 **capacity**

127 Coronavirus nucleocapsid N proteins play an essential role in virus cell cycle; its  
128 dimerization and binding to the viral genomic RNA is the first step for virion particle

129 assembly. N protein plays an important role in viral genomic RNA synthesis [18] and  
130 have been also implicated in the inhibition of type I interferon signaling pathway [19].  
131 A sequence alignment of N protein from SARS-CoV and SARS-CoV-2 viruses show a  
132 high similarity (Fig 1). N Protein consists of two structural domains (Fig 1): the N-  
133 terminal RNA-binding domain (RBD) (residues 41–186), and the C-terminal dimerization  
134 domain (residues 258-361). The rest of the protein is highly disordered [20].

135

136 **Figure 1: Sequence alignment of nucleocapside proteins of SARS-CoV-2**  
137 **(NCAP\_SARS2) and SARS-CoV (NCAP\_CVHSA) viruses.** Numbers at the right end  
138 indicate amino acids position in the SARS-CoV-2 protein. Above the aligned sequences  
139 the RNA-binding (residues 41-186, according to UniProt annotation) and Dimerization  
140 (residues 258-361) domains are delimited. v-above aminoacid residues indicates  
141 phosphorylation sites identified in the works of Davidson et al. [21], Bouhaddou et al.  
142 [6], Klann et al. [16] and Hekman et al. [15]. Highlighted are the segment between a  
143 CK2 phospho-acceptor site and position +3, in yellow those *in silico* predicted by Surjit  
144 et al. [22] and in green those experimentally validated by Davidson et al. [21].  
145 Surjit et al. [22] predicted SARS-CoV N-protein to be heavily phosphorylated. Thr116  
146 and Ser251 were noted as putative phospho-acceptors for CK2 (see Fig 1), though  
147 neither has been corroborated experimentally. We collected a total of 33  
148 phosphorylation sites for SARS-CoV-2 N protein (see Fig 1 and S1 Table) from four  
149 recent mass spectrometry studies [6,15,16,21] reported two putative CK2 sites at Ser2  
150 and Ser78. Hekman et al. [15] found Ser23 and Ser410 to be phosphorylated by CK2.

151 Bouhaddou et al. [6] analyzed the impact of phosphorylation in the N-protein surface  
152 charges by a 3D structural model of the RNA-binding domain. These changes may  
153 modulate the function of N-protein by regulating its RNA binding capacity. One of the  
154 phosphorylation sites responsible for these charge changes is the Ser78 (see Fig 1), a  
155 CK2 phospho-acceptor site according to Davison et al. [21]. Binding of CIGB-300 to  
156 Ser78 would interfere with N-protein RNA binding ability.

157 On the other hand, N protein is reported to be mainly located in the cytoplasm [22-24].  
158 However, a localization analysis of N-expressing cells treated with four different  
159 phosphorylation inhibitors found a significant fraction of N protein localized in the  
160 nucleus of cells treated with CDK or CK2 inhibitors [22]. Additionally, in cell infected by  
161 BCoV, CIGB-300 bound N protein, downregulated its expression and significantly  
162 reduced the accumulation of viral proteins in the cytoplasm [14].

163 Bouhaddou et al. [6] found CDK activity to be significantly reduced by SARS-CoV-2  
164 infection while CK2 activity is significantly increased. Consequently, inhibition by CIGB-  
165 300 of N protein phosphorylation sites may alter, at least in part, its cytoplasmic  
166 localization. Hence, the use of CIGB-300 in Covid-19 patients would interfere the N  
167 protein role in viral cell cycle in infected cells as its function in particle assembly  
168 happens in cytoplasm.

### 169 **CIGB-300 could bind ORF6 C-terminus and restore IFNs signaling**

170 One important element of innate immune response to virus infections is the activation of  
171 antiviral genes as a consequence of interferon production. After activation of receptors  
172 by type I interferons, STAT1 is phosphorylated and forms a complex with STAT2 and



173 IRF9 [25]. This complex exposes a nuclear localization signal (NLS) that is bound by  
174 KPNA1, and as a last step before entering the nucleus KPNB1 binds KPNA1 and  
175 chaperons the complex through the nuclear pore (Fig 2A) [26].

176

177 **Figure 2: Interference of IFN signaling by Orf6 and the role of CIGB-300. A.**

178 Interferon binding to receptor induces STAT1 phosphorylation and formation of a  
179 complex with STAT2 and IRF9. KPNA1 binds the complex, KPNB1 binds KPNA1 and  
180 chaperons the complex through the nuclear pore. B. Orf6 retains KPNA1 and KPNA2 in  
181 the ER/Golgi membrane and the transport of STAT complex to the nucleus interrupted.  
182 C. CIGB-300 blocks the interaction of Orf6 with KPNA2 and the transport of STAT  
183 complex to the nucleus is restored.

184 Several groups have attributed an immune response antagonistic effect to Orf6 protein  
185 [19,26,27]. In SARS-CoV experiments, Frieman et al. [26] reported that Orf6 interferes  
186 with host immune response by antagonizing STAT1 function. Orf6 binds karyopherin  
187 alpha 2 (KPNA2) and retains it in the ER/Golgi membrane. KPNB1 is also retained as it  
188 binds KPNA2. In this way, the chaperon function of KPNB1 through the nuclear pore is  
189 interfered, and STAT1 signaling is interrupted (Fig 2B).

190 Frieman et al. [26] also found that the C-terminal 10 amino acids of SARS-CoV Orf6 are  
191 responsible for KPNA2 binding. In Fig 3 we show the residues of Orf6 involved in the  
192 SARS-CoV mutants they generated , Orf6<sub>49-53Ala</sub>, Orf6<sub>54-58Ala</sub> and Orf6<sub>59-63Ala</sub> (author's  
193 nomenclature), by replacing amino acids 49-53, 54-58 and 59-63 with alanines,  
194 respectively. The last two mutants, Orf6<sub>54-58Ala</sub> and Orf6<sub>59-63Ala</sub>, comprising the ten C-

195 terminal amino acids, did not retain KPNA2 and as consequence, STAT1 function was  
196 unaffected. The first mutant Orf6<sub>49-53Ala</sub> was still able to retain KPNA2. So, the last ten  
197 aminoacids were responsible for KPNA2 binding and, as consequence, for KPNB1  
198 recruitment.

199

200 **Figure 3: Sequence alignment of Orf6 proteins of SARS-CoV-2 (NS6\_CVHSA) and**  
201 **SARS-CoV-2 (NS6\_SARS2) viruses.** Highlighted in red, green and yellow are the  
202 residues that were replaced by alanines in the mutants generated by Frieman et al. [26]  
203 and Lei et al. [28].

204 Recently Lei et al. [28] carried a similar mutation study of SARS-CoV-2 Orf6 protein.  
205 They generated three different mutants; M1, M2 and M3 (author's nomenclature); by  
206 replacing aminoacids 49-52 (YSQL), 53-56 (DEEQ) and 57-61 (PMEID) by alanines,  
207 respectively (Orf6 of SARS-CoV-2 lacks the last two amino acids present in SARS-CoV  
208 protein). As expected, they obtained similar results: mutant M1 perturbs interferon  
209 stimulation as the wild type does, while mutants M2 and M3 lack the inhibitory effect.

210 In Fig 3 we show an alignment of Orf6 protein sequences from SARS-CoV and SARS-  
211 CoV-2 viruses. The region between amino acids 50-53 with the sequence SELD in  
212 SARS-CoV protein and sequence SQLD in SARS-CoV-2, both match the CK2 substrate  
213 motif. Additionally, this site in SARS-CoV-2 was experimentally found to be  
214 phosphorylated, and predicted by computer analysis to be a phospho-acceptor site of  
215 CK2 [16]. Ser50, as a CK2 phospho-acceptor site, could be bound by CIGB-300.  
216 Mutant M2 of Lei et al. [28] include Asp53 residue at position +3 relative to Ser50, and

217 this position is known to be important for the recognition of CK2. Therefore, we strongly  
218 suggest that the possible binding of CIGB-300 to this phospho-acceptor motif would  
219 interfere the interaction of Orf6 C-terminus with KPNA2; avoiding its retention in the  
220 ER/Golgi membrane, without interfering KPNA2 chaperon activity of carrying STAT1  
221 complex to the nucleus (Fig 2C). In this regard, CIGB-300 could exhibit an effect that  
222 other CK2 antagonists that target CK2 won't.

### 223 **Interfering NUP98 hijacking by CIGB-300 via interaction with Orf6 C-** 224 **terminus**

225 We analyzed proteomic expression data from Bojkova et al. [29] and found B23 exhibit  
226 the highest positive correlation with the expression profile of viral proteins (S1 Fig).  
227 SARS-CoV virus N protein was found to interact with B23 protein [30]. Despite that,  
228 Gordon et al. [5] did not reported a direct interaction of B23 with viral proteins. Looking  
229 for indirect interactions, we intersected the interactors of B23 with the 322 proteins  
230 found by Gordon et al. [5] to interact with viral proteins. A total of 21 host proteins  
231 resulted from this intersection, among which Nuclear Pore Complex protein 98 (NUP98)  
232 shown up as the only one that interact with Orf6, the viral protein with the highest  
233 expression correlation to B23.

234 Bouhaddou et al. [6] determined that phosphorylation at Ser888 of NUP98 increased  
235 during viral infection. The sequence around Ser888 is **DSDEEE**, which fulfills the  
236 phospho-acceptor motif of CK2. Additionally, Franchin et al. [31] found the  
237 phosphorylation of Ser888 to be altered by a CK2 inhibitor (according to data  
238 downloaded from PhosphositePlus web site). NUP98 is part of the Nuclear Pore

239 Complex, responsible for the transport of biomolecules between the nucleus and  
240 cytoplasm. Bouhaddou et al. [6] suggested that the SARS-CoV-2 infection-induced  
241 phosphorylation of NUP98 may prevent export of mRNAs through the nuclear pore, a  
242 similar mechanism to those used by other viruses to increase the translation of viral  
243 RNA in the cytoplasm. Binding of CIGB-300 to Ser888 phospho-acceptor site of NUP98  
244 could prevent its phosphorylation and restore host mRNA translocation to cytoplasm.

245 Also, Gordon et al. [5] found that Met58 and acidic residues Glu55, Glu59 and Asp61  
246 are highly conserved in Orf6 homologs and are part of a putative NUP98/RAE binding  
247 motif. Miorin et al. [32] found that SARS-CoV-2 infection blocks the nuclear  
248 translocation of STAT1 and STAT2. Orf6 exerts this anti IFN-I activity by hijacking  
249 NUP98. Orf6 directly interact with NUP98 at the Nuclear Pore Complex(NPC) via its C-  
250 terminal end. A Met58Arg mutant in Orf6 C-terminal region impairs this interaction and  
251 abolish the IFN-I antagonistic effect [32].

252 The Orf6 interactions with KPNA2 and NUP98 have been both reported to interfere with  
253 IFN signaling. In both cases the C-terminal domain of Orf6 was responsible for the  
254 interaction, mutations in this region abolished the anti-IFN activity. The binding of CIGB-  
255 300 to the CK2 phospho-acceptor site Ser50 in Orf6 could impair the interaction with  
256 both KPNA2 and NUP98 and in some extend restore IFN signaling.

257 **CIGB-300 downregulate host proteins phosphosites**  
258 **consistently activated by SARS-CoV-2**

259 We now compare the phosphoproteomics studies of SARS-CoV-2 infection in Vero E6  
260 [6], Caco-2 [16], iAT2 [15] and A549 [17] cell lines with that of Perera et al. [9] on CIGB-  
261 300 kinase antagonistic effect in H125.

262 First, we combined results of the four studies at the level of phosphorylation sites and  
263 found a total of 8642 different sites that were upregulated in at least one of the studies  
264 (Venn diagram in Fig 4A). As noted by Hekman et al. [15], there are few proteins  
265 differentially regulated that coincide in all the four studies. Indeed, we found only six  
266 phosphosites that were upregulated by SARS-CoV-2 infection in the four cell lines.

267

268 **Figure 4: Results of four phosphoproteomics studies on SARS-CoV-infection in**  
269 **iAt2, Vero E6, A549 and Caco-2 cell lines and one study on CIGB-300 treatment**  
270 **effect on phosphorylation in H125 cell line.** A. Venn diagram showing unique  
271 phosphorylation sites identified as UP regulated in A549, VeroE6, iAT2 and Caco-2  
272 cells. B. Venn diagram showing unique phosphorylation sites identified as UP regulated  
273 in A549, VeroE6, iAT2 and Caco-2 cells and DOWN regulated by the action of CIGB-  
274 300.

275 Next, we intersected the data on SARS-CoV-2 infection with that of phosphorylation  
276 sites down regulated by the treatment of H125 cell line with CIGB-300, resulting in a  
277 total of 364 sites (see Fig 4B). Of the six sites that were found upregulated in the four  
278 phosphoproteomics studies, half were downregulated by CIGB-300. These three sites,  
279 MATR3\_S188, SQSTM1\_S272 and DIDO1\_S1456, have in common to have tens of

280 Phosphorylation sites. We envisage that these three phospho-acceptor sites, can be  
281 targeted by a CIGB-300 treatment in Covid-19 patients.

282 MATR3 is a nuclear matrix protein with 36 phosphosites according to UniProt  
283 annotations. MATR3 plays multiple functions in DNA/RNA processing, it contains two  
284 RNA recognition Motifs and two Zinc Finger domains. It was proposed to stabilize  
285 mRNA species, to play a role in the regulation of DNA virus-mediated innate immune  
286 response [33] and to be associated to splicing regulation [34]. In HIV-infected cells,  
287 Sarracino et al. [35] found MATR3 to be essential for RNA processing. MATR3  
288 phosphorylation was found to greatly enhance its DNA binding ability [36,37]. It is well  
289 documented its implications in Amyotrophic lateral sclerosis [38], a disease causing  
290 muscle weakness and respiratory failures, symptoms common in Covid-19 patients.  
291 CIGB-300 interference on virus-infection induced phosphorylation of MATR3 may play a  
292 role diminishing its effects in immune response attenuation and its implications in viral  
293 RNA processing.

294 SQSTM1 exhibit several phosphorylation sites, of these, Ser272 is the only one  
295 significantly activated by Sars-CoV-2 in the four phosphoproteomic studies. Zhang et  
296 al. [39] found that phosphorylation of SQSTM1 at Thr269 and Ser272 by MAPK13  
297 promotes the microaggregates transport to the microtubule organizing center (MTOC) to  
298 form aggresomes which are later degraded through autophagy. Gao et al. [40] also  
299 showed that SQSTM1 phosphorylation increases its ability to sequester ubiquitinated  
300 proteins into aggresomes playing an important role in aggresome formation. Stukalov et  
301 al. [17] revealed significant reduction of autophagy flux by ORF3 which combined with

302 the augmented microaggregates transport due to SQSTM1 phosphorylation conduces  
303 to the accumulation of aggresomes.

304 Several studies have reported the role of SQSTM1 accumulation and aggresome  
305 formation in lung related diseases. Tran et al. [41] demonstrated the role of aggresome  
306 formation induced by cigarette smoke in chronic obstructive pulmonary disease  
307 (COPD). They found a significant higher accumulation of SQSTM1 in smokers as  
308 compared to nonsmokers, and an increased severity of COPD. Wu et al. [42] found that  
309 the accumulation of SQSTM1 plays a critical role in airway inflammation induced by  
310 nanoparticles.

311 Cystic fibrosis (CF), is caused by mutations in the gene encoding the cystic fibrosis  
312 transmembrane conductance regulator (CFTR), which results in defective autophagy,  
313 causing the accumulation of CFTR containing aggregates [43]. SQSTM1 knockdown  
314 favoured the clearance of defective CFTR aggregates [44].

315 Inhibition by CIGB-300 of SQSTM1 phosphorylation at Ser272 may reduce the  
316 accumulation of aggresomes and this way attenuates lung inflammation and fibrosis  
317 induced by viral infection.

318 DIDO1 (death inducer-obliterator 1 or death-associated transcription factor DATF1) is a  
319 protein involved in apoptosis and have been also implicated in the progression of  
320 several type of cancer [45-48]. DIDO1 possess 92 phosphosites, according to data we  
321 downloaded from Phosphosite. Of these sites we found 16 that match the CK2  
322 phospho-acceptor motif described by Pinna [49]. It is not clear the implications of  
323 DIDO1 in the course of viral infection, but it is known the induction of apoptosis by viral

324 proteins and then DIDO1 may be activated by apoptosis pathway through  
325 phosphorylation. CIGB-300 may interfere this activation.

## 326 **CIGB-300 at early Stage of SARS\_CoV-2 Infection**

327 We examine kinase activity from the earliest stages of the viral infection by analyzing  
328 phosphoproteomics data of Bouhaddou et al. [6] at 2h and 4h time points, and from  
329 Hekman et al. [15], at 1h and 3h time points.

330 GSEA analysis with proteins sets ranked by phosphorylation changes was performed to  
331 identify enriched REACTOME pathways.

332 After one hour of infection we observed a clear initial inhibition of host protein synthesis  
333 machinery, reflected in the inactivation of several phosphorylation sites of proteins  
334 involved in RNA metabolism events, such as “mRNA Splicing” and the “Pre-processing  
335 of capped intron containing mRNA” (Fig 5). This inactivation is immediately reverted by  
336 the activation of these same biological events at 2h and 3h. Fig 5 show the list of most  
337 significant pathways at each time point. The phosphosites listed are of those belonging  
338 to proteins from the core enrichment set of each enriched pathway and that were also  
339 identified by Perera et al. [9] to be inactivated by CIGB-300. Of those, SRSF1\_S199  
340 was the only site to be up-regulated at 2h and 3h. SRSF1\_S201 was up-regulated at 3h  
341 as well as some other SRSF’s proteins phosphosites (Fig 5).

342

343 **Figure 5: GSEA gene set enrichment analysis of Reactome pathways of proteins**  
344 **with altered phosphorylation patterns in iAT2 and Vero cell lines.** At the center of



345 the figure is shown a heat map of the normalized enrichment scores resulted from  
346 GSEA analysis. The four columns corresponds to the 1h and 3h time points of iAT2 cell  
347 [15] and 2h and 4h time points of Vero cells [6] after infection by SARS-CoV-2. The  
348 numbers in small rectangles of the heat map indicate the number of proteins in the  
349 enriched set that contain phosphosites upregulated by SARS-CoV-2 infection and  
350 inhibited by CIGB-300 [9], these same sites are listed. The Venn diagram in the top right  
351 was built for the sets proteins of the “mRNA Splicing” Reactome pathways containing  
352 phosphosites that were differentially regulated at 1h, 2h and 3h time points or were  
353 inhibited by the action of CIGB-300 according to Perera et al. [9]. The second Venn  
354 diagram contains similar information for “Metabolism of RNA” Reactome pathway. All  
355 the sites upregulated at some time point by the infection and that were inhibited by  
356 CIGB-300 are listed.

357 SRSFs are RBP splicing factors that belong to the family of S/R rich proteins. Rogan et  
358 al. [50] proposed a molecular mechanism for viral-RNA pulmonary infections based on  
359 protein expression and RBP binding site pattern analysis. They compared the  
360 distribution of RBP binding motifs in several viral genomes including SARS\_CoV-2,  
361 Influenza A, HIV-1 and Dengue. These authors identified strong RBPs binding sites in  
362 SARS-CoV-2 genome. After infection, as the number of SARS-CoV-2 genomes  
363 increase, the proportion of SRSFs bound to viral genome versus host transcriptome  
364 also increases. As the virus replicates in cytoplasm, newly synthesized SRSF1  
365 molecules are bound by viral RNA and retained there, resulting in the formation of R-  
366 loops in the nucleus due to a reduction of RBP import. Rogan et al. [50] suggested that

367 R-loop induced apoptosis could contribute to the spreading of viral particles to  
368 neighboring pneumocytes causing a deterioration of lung functions.

369 Phosphorylation plays an important role in SRSF proteins function. SRPK1 kinase was  
370 shown to phosphorylate multiple serine residues in SR rich domain of SRSF1 [51,52],  
371 promoting its nuclear import where it plays an important role in RNA stability [53] and  
372 alternative splicing [54]. CK2 was found to be the major kinase that phosphorylate  
373 SRPK1 and this phosphorylation occurs mainly at Ser51 and Ser555, resulting in 6-fold  
374 activation of the enzyme [55]. After SARS-CoV-2 infection of AT2 cell, Ser51 is  
375 activated at 3h and 6h [15].

376 Fig 6 show the expression profile of CK2 and the levels of phosphorylation of SRPK1  
377 S51 site, according to data from Hekman et al. [15]. A clear correlation is observed  
378 between the amount of CK2 kinase and the phosphorylation activation of this phospho-  
379 acceptor site, an additional argument supporting the role of CK2 on the activation of  
380 SRPK1 during SARS-CoV-2 infection.

381

382 **Figure 6: CK2 expression and SRKP1\_S51 site phosphorylation profiles.**

383 These results are consistent with previous reports predicting an extensive reshaping of  
384 splicing pathways by SARS-CoV-2 infection [16,29]. SRSF1 is an important element of  
385 this splicing machinery that is clearly used by SARS-CoV-2 for its own replication and  
386 translation.

387 The increasing amount of SRSF1 bound to viral genome as the infection progress is a  
388 clear indication of its role in viral RNA processing. Phosphorylation is an important  
389 mechanism that control SRSF1 function.

390 Taking all these together, we suggest that CIGB-300 intervene SRSF1 role in SARS-  
391 CoV-2 protein synthesis interfering its phosphorylation by SRPK1 kinase.

## 392 **Infection-induced protein-protein interactions could be** 393 **perturbed by CIGB-300**

394 Next, we compared the host-viral PPIs reported by Gordon et al. [5] with  
395 phosphoproteomic data from Perera et al. [9] on the identification of CK2 substrates  
396 significantly inhibited by the CIGB-300. Fig 7 show virus-host interactions from Gordon  
397 et al. [5] in which host proteins contain phospho-acceptor sites that were inhibited by  
398 CIGB-300 treatment (highlighted in yellow). In this network several proteins are relate to  
399 RNA processing and transcription (LARP1, LARP7, LARP4B), supporting the results  
400 already mentioned. Binding of CIGB-300 to phospho-acceptor sites of host proteins  
401 inhibiting its phosphorylation may perturb the binding by viral proteins and consequently  
402 the viral life cycle.

403

404 **Figure 7: Viral protein interactions with host proteins with phosphorylation sites**  
405 **inhibited by CIGB-300.** Rhombus in red represents viral proteins, rectangles in blue  
406 represent host proteins, hexagons represent phospho-acceptor sites. In yellow are  
407 shown those sites whose phosphorylation was increased by SARS-CoV-2 infection.

408 Evaluating how CIGB-300 may interfere host-host protein interactions implicated in  
409 virus-induced mechanisms, we found that 68 proteins (SC2\_300 set from now on) have  
410 activated phospho-acceptor sites in at least two of the four phosphoproteomic studies,  
411 which were inhibited by CIGB-300 (see S2 Table). The protein-protein interactions (PPI)  
412 network built with these proteins is shown in Fig 8. A majority of the nodes in the  
413 network are interconnected indicating potential functional relations among them of  
414 biological significance. Proteins are grouped by mRNA metabolism, Cell Cycle, and  
415 Selective Autophagy pathways, identified as significant by a Reactome enrichment  
416 analysis (see S3 Table). The five proteins with higher degree are also highlighted.  
417 Among them are HNRNPA1, HSPB1, SRRM2, and SRRM1, which are implicated in  
418 mRNA metabolism, corroborating the potential impact of CIGB-300 in viral replication  
419 and transcription. The fifth protein was B23/NPM1, identified as a major target of CIGB-  
420 300 in cancer cells, but also as a relevant target for antiviral therapies [10-12].

421

422 **Figure 8: Interaction network of proteins found to be activated in at least two of**  
423 **the four phosphoproteomics studies analyzed and with phosphoacceptor sites**  
424 **found to be inhibited by the action of CIGB-300.** For each protein the phospho-  
425 acceptor sites inhibited by CIGB-300 are shown. Proteins involved in more significant  
426 pathway are grouped and colored: mRNA metabolism(●), Cell Cycle(●) and 'Selective  
427 Autophagy' (●). The five nodes with a higher degree (HNRNPA1, HSPB1, SRRM2,  
428 NPM1 and SRRM1) are labeled with (●).

429 In this network HSPB1 heat shock protein (alias HSP27) is one of the highest degree  
430 nodes. HSPB1 was found to be overexpressed in idiopathic pulmonary fibrosis (IPF)  
431 patients. It activates pro-fibrotic mechanisms and consequently has been suggested as  
432 a target to treat IPF [56,57]. In tumor cells, Ivermectin inhibits the phosphorylation of  
433 Ser78 and Ser82 of HSP27, while Ser15 is only slightly inhibited [58]. Also Ivermectin  
434 have shown to be on inhibitor of SARS-CoV-2 with a significant reduction of viral RNA  
435 levels [59] and increase the clinical recovery of mild and severe Covid-19 patients  
436 [60,61]. SARS-CoV-2 activates HSPB1 Ser15 and Ser82 during infection while CIGB-  
437 300 inhibits both phospho-acceptor sites [9]. This is an additional argument in favor of  
438 using CIGB-300 in Covid-19 patients aiming to reduce pulmonary lesions as it was  
439 evidenced in a phase I/II clinical trial [13].

## 440 **Human phenotypes involving kinase activity induced by** 441 **SARS-CoV-2, potentially targeted by CIGB-300**

442 We build a network with the top 20 human phenotypes most enriched in the set  
443 SC2\_300, using GeneCodis tool (see Fig 9 and S4 Table). The network can be divided  
444 in two main subnetworks, one related to muscular disorder phenotypes that include  
445 Paralysis, Distal muscle weakness, Rimmed Vacuoles, Mildly elevated creatine kinase  
446 and Fatigue. The second subnetwork groups phenotypes related to  
447 respiratory(Exertional dyspnea, diffuse alveolar hemorrhage), bleeding (Metrorrhagia,  
448 oral cavity bleeding) and coagulation disorders(Disseminated intravascular coagulation).

449

450 **Figure 9: Network representation of Human Phenotypes (HPO) enriched in a set of**  
451 **68 proteins that contain phospho-acceptor-sites that were activated by SARS-**  
452 **CoV-2 infection in at least two of the four phosphoproteomics studies and**  
453 **inhibited by the action of CIGB-300.** Genecodis functional annotation tool was used  
454 for the enrichment analysis and to generate the network of the top 20 enriched  
455 phenotypes. Nodes in blue represents enriched phenotypes and nodes in orange  
456 represent proteins associated to these phenotypes.

457 The phenotypes in the first subnetwork are all associated to HNRNPA1, MATR3 and  
458 SQSTM1 genes, and have been also reported as Covid-19 symptoms [62-66]. For  
459 example, elevated creatine kinase levels is associated to a poor outcome prediction [62]  
460 and persistent fatigue is a common symptom in Covid-19 patients [65]. As we  
461 mentioned MATR3 and SQSTM1 possess phosphosites that were activated in all four  
462 phosphoproteomic studies we analyzed, and HNRNPA1 was the node with the highest  
463 degree in the PPI network built. Rimmed Vacuoles, the most significant of the enriched  
464 phenotypes, are found in areas of destruction of muscle fibers. Fatigue phenotype is  
465 located somewhere in the interface between the two subnetworks and is connected to  
466 the three genes mentioned, and also to the three genes that are in the core of the  
467 second subnetwork: B23/NPM1, FIP1L1 and NUMA1. The phenotypes in the second  
468 subnetwork have been all identified in Covid-19 patients [67,68].

## 469 **Targeting B23 chaperone activity by CIGB-300**

470 Again B23 surfaced as a relevant player of a viral infection, now in the context of SARS-  
471 CoV-2. First, we saw it as the host protein with a higher correlation of expression to

472 viral proteins, in particular to Orf6. Second, we identified B23 as a highly connected  
473 node in a network of proteins consistently upregulated by SARS-CoV-2 infection and  
474 inhibited by CIGB-300, which is related to Cell Cycle pathway (Fig 8). Third, it was part  
475 of a phenotype network related to respiratory, bleeding and coagulation disorders,  
476 symptoms widely reported in Covid-19 disease. Previously, Kondo et al. [69] showed  
477 that B23 inhibited the DNA-binding and transcriptional activity of interferon regulatory  
478 factor 1(IRF1), while Abe et al. [70] found that B23 regulates the expression of IFN- $\gamma$ -  
479 inducible genes and binds to transcription factors STAT1 and IRF1. Taken together,  
480 both Orf6 and B23 might play a role in the inhibitory effect of IFN signaling.

481 On the other hand, it is known that post- translational modifications like phosphorylation  
482 are involved in the regulation of molecular chaperone activities [71]. In particular CK2  
483 phosphorylation was found to play an important role in B23 chaperon activity [72].  
484 CIGB-300 might interfere B23 chaperon activity by inhibiting phosphorylation and  
485 perturbing its interactions with host and viral proteins. For instance, Orf6 localize in  
486 ER/Golgi membrane and NPC associated to KPNA2 and NUP98, respectively. May B23  
487 chaperone activity play a role in SARS-CoV-2 infected cells by carrying Orf6 to the  
488 ER/Golgi membrane and the NPC?

489 Of note, the CIGB-300 peptide interacted with the B23 protein in MDKB cells infected  
490 with a Bovine Coronavirus strain (BCoV) [14]. In these cells, also several host proteins  
491 participating in protein folding, populated the interactomic profile of the CIGB-300  
492 peptide. However, to definitively address any particular role of B23/NPM1 in the context  
493 of an ongoing coronavirus infection, gain- and/or lost-of-function genetic experiments  
494 need to be done.

## 495 **Conclusion**

496 There is, so far, no definite effective therapeutic treatment against SARS-CoV2, despite  
497 progress with the development and extensive use of vaccines. The emergence of  
498 increasingly transmissible and aggressive mutated variants of the virus justifies the  
499 efforts to find new therapeutics to reduce the ratio of patients that evolve to severe  
500 stages and death.

501 Targeting those mechanisms of host cell that are commonly hijacked by viruses, to  
502 reproduce and spread, is a valid strategy to confront present and future challenges of  
503 viral epidemics. CK2 kinase activity is activated by multiple viruses and proved to be  
504 essential for many virus-induced mechanisms that allow viruses to replicate and  
505 damage host cell functions. Phosphorylation is widely altered in human cell immediately  
506 after virus entry, contributing to the hijacking of multiple cellular processes.

507 In this paper putative molecular mechanism are put forward to support the observed  
508 antiviral effects of CIGB-300 in coronavirus infections and the preliminary clinical results  
509 on preventing virus induced lung injury.

510 Our *in-silico* analysis provides evidences of the role of CIGB-300 in the reversion, based  
511 in CK2 kinase activity inhibition, of virus-induced perturbations of cellular functions such  
512 as:

- 513 • N protein localization and RNA binding capabilities which are implicated in  
514 essential steps of viral life cycle as viral capsid assembly.
- 515 • Interference of IFN signaling, which is responsible for a weak immune response.



516 • Early stages of virus kidnapping of RNA processing, which plays an essential  
517 role in virus genome replication and translation.

518 • Aggresome accumulation and its role in Inflammation and fibrosis commonly  
519 observed in severe Covid-19 patients.

520 • Phenotypes related to muscle, bleeding, coagulation and respiratory disorders.

521 Table 1 summarizes different working hypothesis which need to be verified in suitable  
522 pre-clinical models. Notably, while our findings suggest a clear impact of CK2 inhibitors  
523 in viral replication and hijacking strategies, differences could be also inferred based on  
524 their particular inhibitory mechanism. For instance, the use of CIGB-300 to impair CK2-  
525 mediated signaling in cancer do not mirror CX-4945 effects in pre-clinical and clinical  
526 settings, thus the same could be expected in viral infections like those caused by  
527 coronaviruses. The fact that CIGB-300 targets both the CK2 enzyme and a subset of its  
528 substrates, may imply particular inhibitory effects of protein-protein interactions, as well  
529 as in the crosstalks with other nearby Post-translational modifications sites [9];  
530 therefore, resulting into different molecular, cellular and organismal outcomes.

531 Altogether, our computational biology approach supports the potential impact of CIGB-  
532 300 in the treatment of Covid-19 patients, and encourages its clinical evaluation from  
533 early stages of the viral infection.

534

535

536

537 **Table 1: Summary of main findings.**

| Analysis Type                                                               | Subject                 | Identity                                                                      | Working Hypothesis                                                                                             | Experimental Clues                                                                                      | Reference   |
|-----------------------------------------------------------------------------|-------------------------|-------------------------------------------------------------------------------|----------------------------------------------------------------------------------------------------------------|---------------------------------------------------------------------------------------------------------|-------------|
| Individual CK2 sites                                                        | Viral proteins          | N                                                                             | CK2 phosphosite inhibition/blockage by CIGB-300 impairs viral replication and IFN signaling                    | Interaction, co-localization, N mRNA and protein expression inhibition by CIGB-300 in a subrogate model | [14]        |
| Individual CK2 sites                                                        | Viral proteins          | ORF6                                                                          | CK2 phosphosite inhibition/blockage by CIGB-300 impairs IFN signaling                                          | Additive/Synergistic profile of CIGB-300 plus IFN alpha                                                 | Unpublished |
| Co-Expression and network propagation                                       | Host and Viral Proteins | NUP98, ORF6, B23                                                              | CK2 phosphosite inhibition/blockage by CIGB-300 impairs IFN signaling                                          | Additive/Synergistic profile of CIGB-300 plus IFN alpha (unpublished)                                   | Unpublished |
| Phosphoproteome overlap                                                     | Host Proteins           | MATR3, SQSTM1, DIDO1                                                          | CIGB-300 Multitarget effect impairing viral transcription/splicing, inflammation, immunoresponse and apoptosis | Pulmonary lesions resolution in CT Phase I                                                              | [13]        |
| Kinase activity profiles                                                    | Host proteins           | SRPK1 (SRSF1,2,6,10)                                                          | CIGB-300 impairs Viral RNA splicing                                                                            | None, to be evaluated in preclinical settings                                                           | NA          |
| PPIs vs H125 Phosphoproteome                                                | Host and Viral Proteins | Several proteins (see text and Fig. 7)<br>[LARP1,LARP7,LARP4B]                | CIGB-300 impairs Viral RNA processing and transcription                                                        | None, to be evaluated in preclinical settings                                                           | NA          |
| SARS-CoV-2 vs H125 Phosphoproteome overlap, Network and Enrichment analysis | Host proteins           | Several proteins (see text and Fig. 8)<br>[HNRNPA1, HSPB1, SRRM2, SRRM1, B23] | CIGB-300 Multitarget effect impairing on mRNA metabolism cell cycle and Autophagy pathways                     | Pulmonary lesions resolution in CT Phase I                                                              | [13]        |

|                  |               |                                             |                                                 |                                |    |
|------------------|---------------|---------------------------------------------|-------------------------------------------------|--------------------------------|----|
| Human Phenotypes | Host proteins | HNPRNPA1, MATR3, SQSTM1, B23, FIP1L1, NUMA1 | CIGB-300 might relief COVID19 clinical symptoms | To be evaluated in CT Phase II | NA |
|------------------|---------------|---------------------------------------------|-------------------------------------------------|--------------------------------|----|

538

## 539 **Material and Methods**

### 540 **Public Data**

541 Protein sequence information was downloaded from UniprotKB database [73]

542 <https://www.uniprot.org/>.

543 Data sources from phosphoproteomics studies of host and viral proteins of SARS-CoV-

544 2 infected human cell lines were downloaded from site listed in table 2.

#### 545 **Table 2: SARS-CoV-2 infection phosphoproteomics studies data sources.**

| Reference              | Timepoints           | Cell lines | Downloaded from:                                                                                                                                                                                |
|------------------------|----------------------|------------|-------------------------------------------------------------------------------------------------------------------------------------------------------------------------------------------------|
| Bouhaddou et al (2020) | 2h,4h,8h,12h and 24h | Vero E6    | <a href="http://dx.doi.org/10.17632/dpkbh2g9hy.1">http://dx.doi.org/10.17632/dpkbh2g9hy.1</a>                                                                                                   |
| Hekman et al (2020)    | 1h,3h,6h and 24h     | iAT2       | <a href="https://www.ebi.ac.uk/pride/archive/projects/PXD020183">https://www.ebi.ac.uk/pride/archive/projects/PXD020183</a>                                                                     |
| Stukalov et al (2021)  | 6h and 24h           | A549       | <a href="https://www.nature.com/articles/s41586-021-03493-4#MOESM5">https://www.nature.com/articles/s41586-021-03493-4#MOESM5</a>                                                               |
| Klann et. al (2020)    | 24h                  | CaCo-2     | <a href="https://www.cell.com/molecular-cell/fulltext/S1097-2765(20)30549-9#supplementaryMaterial">https://www.cell.com/molecular-cell/fulltext/S1097-2765(20)30549-9#supplementaryMaterial</a> |

546

547 The phosphorylation data of CIGB-300 treatment from Perera et al. [9] were

548 downloaded from [https://link.springer.com/article/10.1007%2Fs11010-020-03747-](https://link.springer.com/article/10.1007%2Fs11010-020-03747-1#additional-information/)

549 [1#additional-information/](https://link.springer.com/article/10.1007%2Fs11010-020-03747-1#additional-information/).

550 Protein expression data from Bojkova et al. [29] were downloaded from

551 <http://corona.papers.biochem2.com/>.

552 A total of 332 humand-SARS-CoV-2 protein-protein interactions from Gordon et al. [5]

553 were downloaded from Biogrid database [74] at

554 <https://thebiogrid.org/225737/publication/comparative-host-coronavirus-protein->

555 [interaction-networks-reveal-pan-viral-disease-mechanisms.html#!](https://thebiogrid.org/225737/publication/comparative-host-coronavirus-protein-interaction-networks-reveal-pan-viral-disease-mechanisms.html#!).

556 Information of CK2 Substrates was downloaded from PhosphoSitePlus at

557 (<https://www.phosphosite.org/>) [75].

## 558 **Data Analysis**

559 Sequence alignments were performed with the desktop version of CLUSTALX multiple

560 sequence alignment program [76].

561 Analysis of proteomics data from Bojkova et al. [29] was carried out with MEV [77]. SAM

562 method [78] for two-class unpaired comparison was used to identify most differentially

563 expressed proteins as implemented in MEV. Parameter delta was set so that the

564 estimated median number of false significant proteins would be zero.

565 For Bouhaddou et al. [6], Stukalov et al. [17], Klann et al. [16] and Hekman et al. [15]

566 data on phosphorylation induced by SARS-CoV-2 infection, the criteria for choosing

567 differentially phosphorylated sites was  $\log_2$  fold change  $\geq 0.25$  and adjusted-p-

568 value  $\leq 0.05$ , the same values proposed by Hekman et al. [15].

569 The phosphorylation changes induced by CIGB-300 treatment were extracted from  
570 Perera et al. [9] . All inhibitions reported by the authors at 10 and/or 30 minutes were  
571 considered.

572 For Gene Set Enrichment Analysis we used GSEA version 4.1.0 for windows [79,80].  
573 Ordered gene lists for each time point after infection were provided as input. The pre-  
574 ranked gene list option was used for databases containing REACTOME and GO  
575 biological process gene sets. MSigdb v7.2 gmt files were downloaded from:  
576 <http://www.gsea-msigdb.org/gsea/downloads.jsp>.

577 Cytoscape tool [81,82] was used to build and merge networks in Figs 7 and 8.

578 BisoGenet CytoScape plugin [83], available from CytoScape Application Manager, was  
579 used to generate Protein- protein interaction (PPI) networks.

580 Venn Diagrams were generated using web application in  
581 <http://bioinformatics.psb.ugent.be/>.

582 Functional analysis of enriched pathways and reactions was performed using Reactome  
583 Pathway Knowledgebase [84] at: <https://reactome.org/>. The criteria used for selection  
584 was FDR (False Discovery Rate)  $\leq 0.05$ .

585 GeneCodis 4.0, at <https://genecodis.genyo.es/>, was used for diseases enrichment  
586 analysis [85]. Data sources for Human Phenotypes HPO and OMIM were both  
587 consulted individually and integrated. The results were obtained in form of networks  
588 clusters.

589 BiNGO plugin [86], available from Cytoscape Application Manager, was used to  
590 determine and visualize Gene Ontology (GO) categories statistically overrepresented.  
591 Additional statistical analysis and graphs were generated and plotted using GraphPad  
592 Prism version 5.00 software (GraphPad Software, San Diego, CA, USA).

593

## 594 **Acknowledgments**

595 We thank Ricardo Javier Bringas for the design and drawing of figure 2.

596

## 597 **Author Contributions**

598 **Conceptualization:** Jamilet Miranda, Ricardo Bringas, Yasser Perera.

599 **Data curation:** Jamilet Miranda, Ricardo Bringas.

600 **Formal analysis:** Jamilet Miranda, Ricardo Bringas.

601 **Investigation:** Jamilet Miranda, Ricardo Bringas, Yasser Perera.

602 **Methodology:** Jamilet Miranda, Ricardo Bringas, Jorge Fernandez de Cossio, Yasser Perera.

603 **Supervision:** Ricardo Bringas, Yasser Perera.

604 **Writing – original draft:** Jamilet Miranda, Ricardo Bringas.

605 **Writing – review & editing:** Jamilet Miranda, Ricardo Bringas, Jorge Fernandez de Cossio, Yasser

606 Perera.

607

608

## 609 References

- 610 1. Serafin MB, Bottega A, Foletto VS, da Rosa TF, Horner A, et al. (2020) Drug repositioning is an  
611 alternative for the treatment of coronavirus COVID-19. *Int J Antimicrob Agents* 55: 105969.
- 612 2. Zhou Y, Wang F, Tang J, Nussinov R, Cheng F (2020) Artificial intelligence in COVID-19 drug  
613 repurposing. *Lancet Digit Health* 2: e667-e676.
- 614 3. Zhou P, Yang XL, Wang XG, Hu B, Zhang L, et al. (2020) A pneumonia outbreak associated with a new  
615 coronavirus of probable bat origin. *Nature* 579: 270-273.
- 616 4. Blanco-Melo D, Nilsson-Payant BE, Liu WC, Uhl S, Hoagland D, et al. (2020) Imbalanced Host Response  
617 to SARS-CoV-2 Drives Development of COVID-19. *Cell* 181: 1036-1045 e1039.
- 618 5. Gordon DE, Jang GM, Bouhaddou M, Xu J, Obernier K, et al. (2020) A SARS-CoV-2 protein interaction  
619 map reveals targets for drug repurposing. *Nature* 583: 459-468.
- 620 6. Bouhaddou M, Memon D, Meyer B, White KM, Rezelj VV, et al. (2020) The Global Phosphorylation  
621 Landscape of SARS-CoV-2 Infection. *Cell* 182: 685-712 e619.
- 622 7. Aguila JDFV, Y. G.; Jiménez, R. O. R.; Sacerio, A. L.; Rodríguez, C. R. R.; Fraga, Y. R.; Silva, C. V., (2016)  
623 Safety of intravenous application of CIGB-300 in patients with hematological malignancies.  
624 EHPMA study. . *Revista Cubana de Hematología, Inmunología y Hemoterapia* 32: 236-248.
- 625 8. García-Diegues RdIT-S, A. (2018) Phase I Study of CIGB-300 Administered Intravenously in Patients  
626 with Relapsed/Refractory Solid Tumors. *ARCHIVOS DE MEDICINA* 1: 4.
- 627 9. Perera Y, Ramos Y, Padron G, Caballero E, Guirola O, et al. (2020) CIGB-300 anticancer peptide  
628 regulates the protein kinase CK2-dependent phosphoproteome. *Mol Cell Biochem* 470: 63-75.
- 629 10. Perera Y, Farina HG, Gil J, Rodriguez A, Benavent F, et al. (2009) Anticancer peptide CIGB-300 binds  
630 to nucleophosmin/B23, impairs its CK2-mediated phosphorylation, and leads to apoptosis  
631 through its nucleolar disassembly activity. *Mol Cancer Ther* 8: 1189-1196.
- 632 11. Nouri K, Moll JM, Milroy LG, Hain A, Dvorsky R, et al. (2015) Biophysical Characterization of  
633 Nucleophosmin Interactions with Human Immunodeficiency Virus Rev and Herpes Simplex Virus  
634 US11. *PLoS One* 10: e0143634.
- 635 12. Lobaina Y, Perera Y (2019) Implication of B23/NPM1 in Viral Infections, Potential Uses of B23/NPM1  
636 Inhibitors as Antiviral Therapy. *Infect Disord Drug Targets* 19: 2-16.
- 637 13. Cruz LR, Baladron I, Rittoles A, Diaz PA, Valenzuela C, et al. (2020) Treatment with an Anti-CK2  
638 Synthetic Peptide Improves Clinical Response in COVID-19 Patients with Pneumonia. A  
639 Randomized and Controlled Clinical Trial. *ACS Pharmacol Transl Sci* 4: 206-212.
- 640 14. Ramón A, Pérez G, Caballero E, Rosales M, Aguilar D, et al. (2021) Targeting of Protein Kinase CK2  
641 Elicits Antiviral Activity on Bovine Coronavirus Infection.
- 642 15. Hekman RM, Hume AJ, Goel RK, Abo KM, Huang J, et al. (2020) Actionable Cytopathogenic Host  
643 Responses of Human Alveolar Type 2 Cells to SARS-CoV-2. *Mol Cell* 80: 1104-1122 e1109.
- 644 16. Klann K, Bojkova D, Tascher G, Ciesek S, Munch C, et al. (2020) Growth Factor Receptor Signaling  
645 Inhibition Prevents SARS-CoV-2 Replication. *Mol Cell* 80: 164-174 e164.
- 646 17. Stukalov A, Girault V, Grass V, Karayel O, Bergant V, et al. (2021) Multilevel proteomics reveals host  
647 perturbations by SARS-CoV-2 and SARS-CoV. *Nature* 594: 246-252.
- 648 18. Wu CH, Chen PJ, Yeh SH (2014) Nucleocapsid phosphorylation and RNA helicase DDX1 recruitment  
649 enables coronavirus transition from discontinuous to continuous transcription. *Cell Host  
650 Microbe* 16: 462-472.
- 651 19. Li JY, Liao CH, Wang Q, Tan YJ, Luo R, et al. (2020) The ORF6, ORF8 and nucleocapsid proteins of  
652 SARS-CoV-2 inhibit type I interferon signaling pathway. *Virus Res* 286: 198074.

- 653 20. Chang CK, Sue SC, Yu TH, Hsieh CM, Tsai CK, et al. (2006) Modular organization of SARS coronavirus  
654 nucleocapsid protein. *J Biomed Sci* 13: 59-72.
- 655 21. Davidson AD, Williamson MK, Lewis S, Shoemark D, Carroll MW, et al. (2020) Characterisation of the  
656 transcriptome and proteome of SARS-CoV-2 reveals a cell passage induced in-frame deletion of  
657 the furin-like cleavage site from the spike glycoprotein. *Genome Med* 12: 68.
- 658 22. Surjit M, Kumar R, Mishra RN, Reddy MK, Chow VT, et al. (2005) The severe acute respiratory  
659 syndrome coronavirus nucleocapsid protein is phosphorylated and localizes in the cytoplasm by  
660 14-3-3-mediated translocation. *J Virol* 79: 11476-11486.
- 661 23. Chang MS, Lu YT, Ho ST, Wu CC, Wei TY, et al. (2004) Antibody detection of SARS-CoV spike and  
662 nucleocapsid protein. *Biochem Biophys Res Commun* 314: 931-936.
- 663 24. Zhang J, Cruz-Cosme R, Zhuang MW, Liu D, Liu Y, et al. (2020) A systemic and molecular study of  
664 subcellular localization of SARS-CoV-2 proteins. *Signal Transduct Target Ther* 5: 269.
- 665 25. Schneider WM, Chevillotte MD, Rice CM (2014) Interferon-stimulated genes: a complex web of host  
666 defenses. *Annu Rev Immunol* 32: 513-545.
- 667 26. Frieman M, Yount B, Heise M, Kopecky-Bromberg SA, Palese P, et al. (2007) Severe acute respiratory  
668 syndrome coronavirus ORF6 antagonizes STAT1 function by sequestering nuclear import factors  
669 on the rough endoplasmic reticulum/Golgi membrane. *J Virol* 81: 9812-9824.
- 670 27. Yuen CK, Lam JY, Wong WM, Mak LF, Wang X, et al. (2020) SARS-CoV-2 nsp13, nsp14, nsp15 and orf6  
671 function as potent interferon antagonists. *Emerg Microbes Infect* 9: 1418-1428.
- 672 28. Lei X, Dong X, Ma R, Wang W, Xiao X, et al. (2020) Activation and evasion of type I interferon  
673 responses by SARS-CoV-2. *Nat Commun* 11: 3810.
- 674 29. Bojkova D, Klann K, Koch B, Widera M, Krause D, et al. (2020) Proteomics of SARS-CoV-2-infected  
675 host cells reveals therapy targets. *Nature* 583: 469-472.
- 676 30. Zeng Y, Ye L, Zhu S, Zheng H, Zhao P, et al. (2008) The nucleocapsid protein of SARS-associated  
677 coronavirus inhibits B23 phosphorylation. *Biochem Biophys Res Commun* 369: 287-291.
- 678 31. Franchin C, Cesaro L, Salvi M, Millionsi R, Iori E, et al. (2015) Quantitative analysis of a  
679 phosphoproteome readily altered by the protein kinase CK2 inhibitor quinalizarin in HEK-293T  
680 cells. *Biochim Biophys Acta* 1854: 609-623.
- 681 32. Miorin L, Kehrer T, Sanchez-Aparicio MT, Zhang K, Cohen P, et al. (2020) SARS-CoV-2 Orf6 hijacks  
682 Nup98 to block STAT nuclear import and antagonize interferon signaling. *Proc Natl Acad Sci U S*  
683 *A* 117: 28344-28354.
- 684 33. Salton M, Elkon R, Borodina T, Davydov A, Yaspo ML, et al. (2011) Matrin 3 binds and stabilizes  
685 mRNA. *PLoS One* 6: e23882.
- 686 34. Yamaguchi A, Takanashi K (2016) FUS interacts with nuclear matrix-associated protein SAFB1 as well  
687 as Matrin3 to regulate splicing and ligand-mediated transcription. *Sci Rep* 6: 35195.
- 688 35. Sarracino A, Gharu L, Kula A, Pasternak AO, Avettand-Fenoel V, et al. (2018) Posttranscriptional  
689 Regulation of HIV-1 Gene Expression during Replication and Reactivation from Latency by  
690 Nuclear Matrix Protein MATR3. *mBio* 9.
- 691 36. Hibino Y, Ohzeki H, Hirose N, Sugano N (1998) Involvement of phosphorylation in binding of nuclear  
692 scaffold proteins from rat liver to a highly repetitive DNA component. *Biochim Biophys Acta*  
693 1396: 88-96.
- 694 37. Malik AM, Barmada SJ (2021) Matrin 3 in neuromuscular disease: physiology and pathophysiology.  
695 *JCI Insight* 6.
- 696 38. Johnson JO, Pioro EP, Boehringer A, Chia R, Feit H, et al. (2014) Mutations in the Matrin 3 gene cause  
697 familial amyotrophic lateral sclerosis. *Nat Neurosci* 17: 664-666.
- 698 39. Zhang C, Gao J, Li M, Deng Y, Jiang C (2018) p38delta MAPK regulates aggresome biogenesis by  
699 phosphorylating SQSTM1 in response to proteasomal stress. *J Cell Sci* 131.



- 700 40. Gao J, Li M, Qin S, Zhang T, Jiang S, et al. (2016) Cytosolic PINK1 promotes the targeting of  
701 ubiquitinated proteins to the aggresome-autophagy pathway during proteasomal stress.  
702 *Autophagy* 12: 632-647.
- 703 41. Tran I, Ji C, Ni I, Min T, Tang D, et al. (2015) Role of Cigarette Smoke-Induced Aggresome Formation  
704 in Chronic Obstructive Pulmonary Disease-Emphysema Pathogenesis. *Am J Respir Cell Mol Biol*  
705 53: 159-173.
- 706 42. Wu Y, Jin Y, Sun T, Zhu P, Li J, et al. (2020) p62/SQSTM1 accumulation due to degradation inhibition  
707 and transcriptional activation plays a critical role in silica nanoparticle-induced airway  
708 inflammation via NF-kappaB activation. *J Nanobiotechnology* 18: 77.
- 709 43. Luciani A, Vilella VR, Esposito S, Brunetti-Pierri N, Medina DL, et al. (2011) Cystic fibrosis: a disorder  
710 with defective autophagy. *Autophagy* 7: 104-106.
- 711 44. Luciani A, Vilella VR, Esposito S, Brunetti-Pierri N, Medina D, et al. (2010) Defective CFTR induces  
712 aggresome formation and lung inflammation in cystic fibrosis through ROS-mediated autophagy  
713 inhibition. *Nat Cell Biol* 12: 863-875.
- 714 45. Garcia-Domingo D, Leonardo E, Grandien A, Martinez P, Albar JP, et al. (1999) DIO-1 is a gene  
715 involved in onset of apoptosis in vitro, whose misexpression disrupts limb development. *Proc*  
716 *Natl Acad Sci U S A* 96: 7992-7997.
- 717 46. Lerebours F, Vacher S, Guinebretiere JM, Rondeau S, Caly M, et al. (2021) Hemoglobin  
718 overexpression and splice signature as new features of inflammatory breast cancer? *J Adv Res*  
719 28: 77-85.
- 720 47. Li J, Wang AS, Wang S, Wang CY, Xue S, et al. (2020) Death-inducer obliterator 1 (DIDO1) silencing  
721 suppresses growth of bladder cancer cells through decreasing SAPK/JNK signaling cascades.  
722 *Neoplasma* 67: 1074-1084.
- 723 48. Xiao J, Zhang R, Peng J, Yang Z (2020) BAP1 maintains chromosome stability by stabilizing DIDO1 in  
724 renal cell carcinoma. *Am J Cancer Res* 10: 1455-1466.
- 725 49. Pinna LA (2002) Protein kinase CK2: a challenge to canons. *J Cell Sci* 115: 3873-3878.
- 726 50. Rogan PA-O, Mucaki EJ, Shirley BC (2021) A proposed molecular mechanism for pathogenesis of  
727 severe RNA-viral pulmonary infections.
- 728 51. Hagopian JC, Ma CT, Meade BR, Albuquerque CP, Ngo JC, et al. (2008) Adaptable molecular  
729 interactions guide phosphorylation of the SR protein ASF/SF2 by SRPK1. *J Mol Biol* 382: 894-909.
- 730 52. Mole S, Faizo AAA, Hernandez-Lopez H, Griffiths M, Stevenson A, et al. (2020) Human papillomavirus  
731 type 16 infection activates the host serine arginine protein kinase 1 (SRPK1) - splicing factor axis.  
732 *J Gen Virol* 101: 523-532.
- 733 53. Li X, Manley JL (2005) Inactivation of the SR protein splicing factor ASF/SF2 results in genomic  
734 instability. *Cell* 122: 365-378.
- 735 54. Ghosh G, Adams JA (2011) Phosphorylation mechanism and structure of serine-arginine protein  
736 kinases. *FEBS J* 278: 587-597.
- 737 55. Mylonis I, Giannakouros T (2003) Protein kinase CK2 phosphorylates and activates the SR protein-  
738 specific kinase 1. *Biochem Biophys Res Commun* 301: 650-656.
- 739 56. Park AM, Kanai K, Itoh T, Sato T, Tsukui T, et al. (2016) Heat Shock Protein 27 Plays a Pivotal Role in  
740 Myofibroblast Differentiation and in the Development of Bleomycin-Induced Pulmonary  
741 Fibrosis. *PLoS One* 11: e0148998.
- 742 57. Wettstein G, Bellaye PS, Kolb M, Hammann A, Crestani B, et al. (2013) Inhibition of HSP27 blocks  
743 fibrosis development and EMT features by promoting Snail degradation. *FASEB J* 27: 1549-1560.
- 744 58. Nappi L, Aguda AH, Nakouzi NA, Lelj-Garolla B, Beraldi E, et al. (2020) Ivermectin inhibits HSP27 and  
745 potentiates efficacy of oncogene targeting in tumor models. *J Clin Invest* 130: 699-714.
- 746 59. Caly L, Druce JD, Catton MG, Jans DA, Wagstaff KM (2020) The FDA-approved drug ivermectin  
747 inhibits the replication of SARS-CoV-2 in vitro. *Antiviral Res* 178: 104787.

- 748 60. Ahmed S, Karim MM, Ross AG, Hossain MS, Clemens JD, et al. (2021) A five-day course of ivermectin  
749 for the treatment of COVID-19 may reduce the duration of illness. *Int J Infect Dis* 103: 214-216.
- 750 61. Okumus N, Demirturk N, Cetinkaya RA, Guner R, Avci IY, et al. (2021) Evaluation of the effectiveness  
751 and safety of adding ivermectin to treatment in severe COVID-19 patients. *BMC Infect Dis* 21:  
752 411.
- 753 62. Akbar MR, Pranata R, Wibowo A, Lim MA, Sihite TA, et al. (2021) The prognostic value of elevated  
754 creatine kinase to predict poor outcome in patients with COVID-19 - A systematic review and  
755 meta-analysis. *Diabetes Metab Syndr* 15: 529-534.
- 756 63. Chan KH, Farouji I, Abu Hanoud A, Slim J (2020) Weakness and elevated creatinine kinase as the  
757 initial presentation of coronavirus disease 2019 (COVID-19). *Am J Emerg Med* 38: 1548 e1541-  
758 1548 e1543.
- 759 64. De Giorgio MR, Di Noia S, Morciano C, Conte D (2020) The impact of SARS-CoV-2 on skeletal muscles.  
760 *Acta Myol* 39: 307-312.
- 761 65. Townsend L, Dyer AH, Jones K, Dunne J, Mooney A, et al. (2020) Persistent fatigue following SARS-  
762 CoV-2 infection is common and independent of severity of initial infection. *PLoS One* 15:  
763 e0240784.
- 764 66. Versace V, Sebastianelli L, Ferrazzoli D, Saltuari L, Kofler M, et al. (2021) Case Report: Myopathy in  
765 Critically Ill COVID-19 Patients: A Consequence of Hyperinflammation? *Front Neurol* 12: 625144.
- 766 67. Levi M, Iba T (2021) COVID-19 coagulopathy: is it disseminated intravascular coagulation? *Intern*  
767 *Emerg Med* 16: 309-312.
- 768 68. Singh P, Schwartz RA (2020) Disseminated intravascular coagulation: A devastating systemic disorder  
769 of special concern with COVID-19. *Dermatol Ther* 33: e14053.
- 770 69. Kondo T, Minamino N, Nagamura-Inoue T, Matsumoto M, Taniguchi T, et al. (1997) Identification  
771 and characterization of nucleophosmin/B23/numatrin which binds the anti-oncogenic  
772 transcription factor IRF-1 and manifests oncogenic activity. *Oncogene* 15: 1275-1281.
- 773 70. Abe M, Lin J, Nagata K, Okuwaki M (2018) Selective regulation of type II interferon-inducible genes  
774 by NPM1/nucleophosmin. *FEBS Lett* 592: 244-255.
- 775 71. Jovcevski B, Kelly MA, Rote AP, Berg T, Gastall HY, et al. (2015) Phosphomimics destabilize Hsp27  
776 oligomeric assemblies and enhance chaperone activity. *Chem Biol* 22: 186-195.
- 777 72. Szebeni A, Hingorani K, Negi S, Olson MO (2003) Role of protein kinase CK2 phosphorylation in the  
778 molecular chaperone activity of nucleolar protein b23. *J Biol Chem* 278: 9107-9115.
- 779 73. Pundir S, Martin MJ, O'Donovan C (2017) UniProt Protein Knowledgebase. *Methods Mol Biol* 1558:  
780 41-55.
- 781 74. Stark C, Breitkreutz BJ, Reguly T, Boucher L, Breitkreutz A, et al. (2006) BioGRID: a general repository  
782 for interaction datasets. *Nucleic Acids Res* 34: D535-539.
- 783 75. Hornbeck PV, Zhang B, Murray B, Kornhauser JM, Latham V, et al. PhosphoSitePlus, 2014: mutations,  
784 PTMs and recalibrations. *Nucleic Acids Res* 43: D512-520.
- 785 76. Thompson JD, Gibson TJ, Plewniak F, Jeanmougin F, Higgins DG (1997) The CLUSTAL\_X windows  
786 interface: flexible strategies for multiple sequence alignment aided by quality analysis tools.  
787 *Nucleic Acids Res* 25: 4876-4882.
- 788 77. Saeed AI, Bhagabati NK, Braisted JC, Liang W, Sharov V, et al. (2006) TM4 microarray software suite.  
789 *Methods Enzymol* 411: 134-193.
- 790 78. Tusher VG, Tibshirani R, Chu G (2001) Significance analysis of microarrays applied to the ionizing  
791 radiation response. *Proc Natl Acad Sci U S A* 98: 5116-5121.
- 792 79. Mootha VK, Lindgren CM, Eriksson KF, Subramanian A, Sihag S, et al. (2003) PGC-1alpha-responsive  
793 genes involved in oxidative phosphorylation are coordinately downregulated in human diabetes.  
794 *Nat Genet* 34: 267-273.

- 795 80. Subramanian A, Tamayo P, Mootha VK, Mukherjee S, Ebert BL, et al. (2005) Gene set enrichment  
796 analysis: a knowledge-based approach for interpreting genome-wide expression profiles. Proc  
797 Natl Acad Sci U S A 102: 15545-15550.
- 798 81. Shannon P, Markiel A, Ozier O, Baliga NS, Wang JT, et al. (2003) Cytoscape: a software environment  
799 for integrated models of biomolecular interaction networks. Genome Res 13: 2498-2504.
- 800 82. Smoot ME, Ono K, Ruscheinski J, Wang PL, Ideker T (2011) Cytoscape 2.8: new features for data  
801 integration and network visualization. Bioinformatics 27: 431-432.
- 802 83. Martin A, Ochagavia ME, Rabasa LC, Miranda J, Fernandez-de-Cossio J, et al. BisoGenet: a new tool  
803 for gene network building, visualization and analysis. BMC Bioinformatics 11: 91.
- 804 84. Jassal B, Matthews L, Viteri G, Gong C, Lorente P, et al. The reactome pathway knowledgebase.  
805 Nucleic Acids Res 48: D498-D503.
- 806 85. Tabas-Madrid D, Nogales-Cadenas R, Pascual-Montano A (2012) GeneCodis3: a non-redundant and  
807 modular enrichment analysis tool for functional genomics. Nucleic Acids Res 40: W478-483.
- 808 86. Maere S, Heymans K, Kuiper M (2005) BiNGO: a Cytoscape plugin to assess overrepresentation of  
809 gene ontology categories in biological networks. Bioinformatics 21: 3448-3449.

810

## 811 **Supporting information**

812 **S1 Fig. Bidimensional clustering of most differentially expressed proteins**  
813 **resulting from the analysis of proteomic data of CaCo-2 cells infected by SARS-**  
814 **CoV-2 from Bojkova et al.(2020).** Horizontal axis represents samples at different time  
815 points and vertical axis represent differentially expressed proteins. Rows corresponding  
816 to viral Orf6 and host B23 proteins are labeled.

817 **S1 Table. N phospho-acceptor sites reported in four phosphoproteomics**  
818 **studies\*.**

819 **S2 Table. List of 102 phosphosites activated in at least two of the four**  
820 **phosphoproteomic studies.** Level 1 (in 4 experiments), level 2 (in 3 experiments) and  
821 level 3 (in 2 experiments).

822 **S3 Table. REACTOME pathways enrichment results.**

823 **S4 Table. Human phenotypes enrichment results.**

824

```

      v          vv v          v          |-----
NCAP_SARS2  MSDNGPQ-NQRNAPRITFGGPSDSTGSNQNGERSGARSKQRRPQGLPNN TASWFTALTQH  59
NCAP_CVHSA  MSDNGPQSNQRSAPRITFGGPTDSTDNNQNGGRNGARPKQRRPQGLPNN TASWFTALTQH
*****  ***.*****:***.***.*****.*****

-----v-vv----- RNA binding domain -v---v-----
NCAP_SARS2  GKEDLKFPRGQGVPIINTNSSPDDQIGYYRRATRIRGGDGKMKDLSPRWYFY YLGTGPEA  119
NCAP_CVHSA  GKEELRFPRGQGVPIINTNSGPDDQIGYYRRATRRVRGGDGKMKELSPRWYFY YLGTGPEA
***:*:*****.*****:*****:*****

-----v-----v-----v-----
NCAP_SARS2  GLPYGANKDGI IWVATEGALNTPKDHIGTRNPANNAIVLQLPQGTTLPKGFYAEGSRGG  179
NCAP_CVHSA  SLPYGANKEGIVVATEGALNTPKDHIGTRNPNNNAATV LQLPQGTTLPKGFYAEGSRGG
.*****:***:***** ***** *****

v--vv|vvv v v vv vv vv
NCAP_SARS2  SQASSRS SS RSRNS SRNST PGSSRGTS PARMAGNGGDAA LALLLLDRLN QLE SKMSGKGQ  239
NCAP_CVHSA  SQASSRS SS RSRGNS RNST PGSSRGNS PARMASGGGETA LALLLLDRLN QLE SKVSGKGQ
*****.*****S****.*****.***: *****:*****

|-----
NCAP_SARS2  QQQGQTVTK KAAEASKKPRQKRTATKAYNVTQAFGRRGPEQTQGNFGDQELI RQGTDYK  299
NCAP_CVHSA  QQQGQTVTK KSAAEASKKP RQKRTATKQYNVTQAFGRRGPEQTQGNFGDQDL IRQGTDYK
*****.***** *****:*****

----- Dimerization domain -----
NCAP_SARS2  HWPQIAQFA PSASAFFGMS RIGMEVTPSGTWLTYTGAIK LDDKDPNFKDQVI LLNKHIDA  359
NCAP_CVHSA  HWPQIAQFA PSASAFFGMS RIGMEVTPSGTWLTYHGAIK LDDKDPQFKDNVI LLNKHIDA
*****.***** *****:*****

-|          v          v v v vv
NCAP_SARS2  YKTFPPTEPKKDKKKKADE TQALPQRQKQQTVTLLPAA DLD DFSKQLQSMS--SADST  417
NCAP_CVHSA  YKTFPPTEPKKDKKKKTDE AQPLPQRQKQPTVTLLPAA DMDDFSRQLQNSMSGASADST
*****:***:*:***** *****:*****:*****:*** *****

NCAP_SARS2  QA 419
NCAP_CVHSA  QA
**

```

Figure



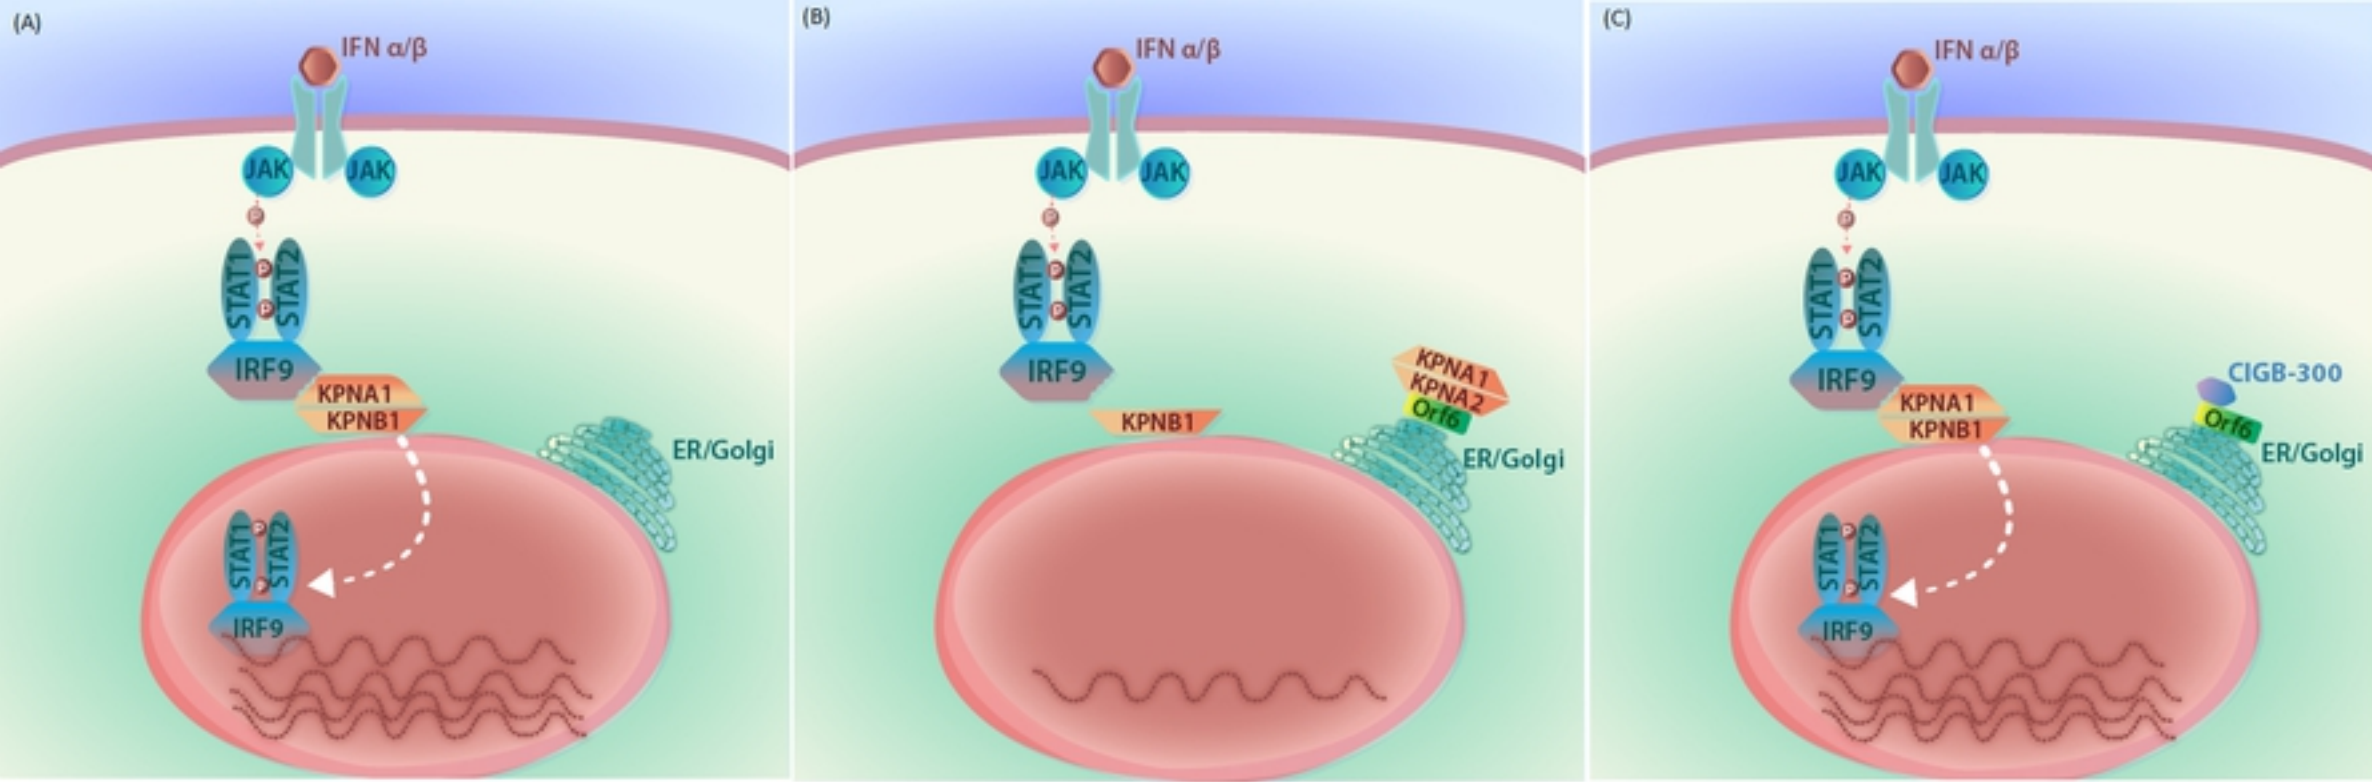

Figure



(A)

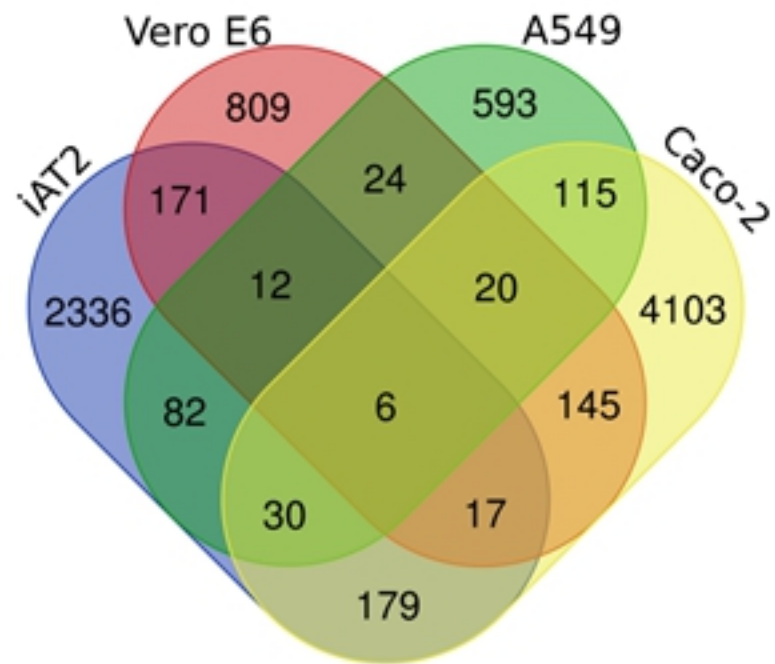

(B)

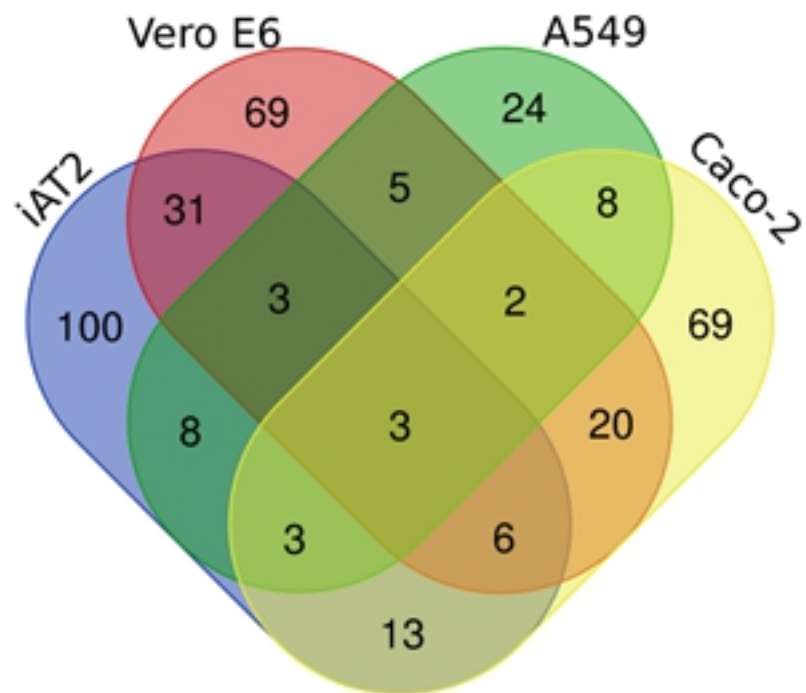

Figure



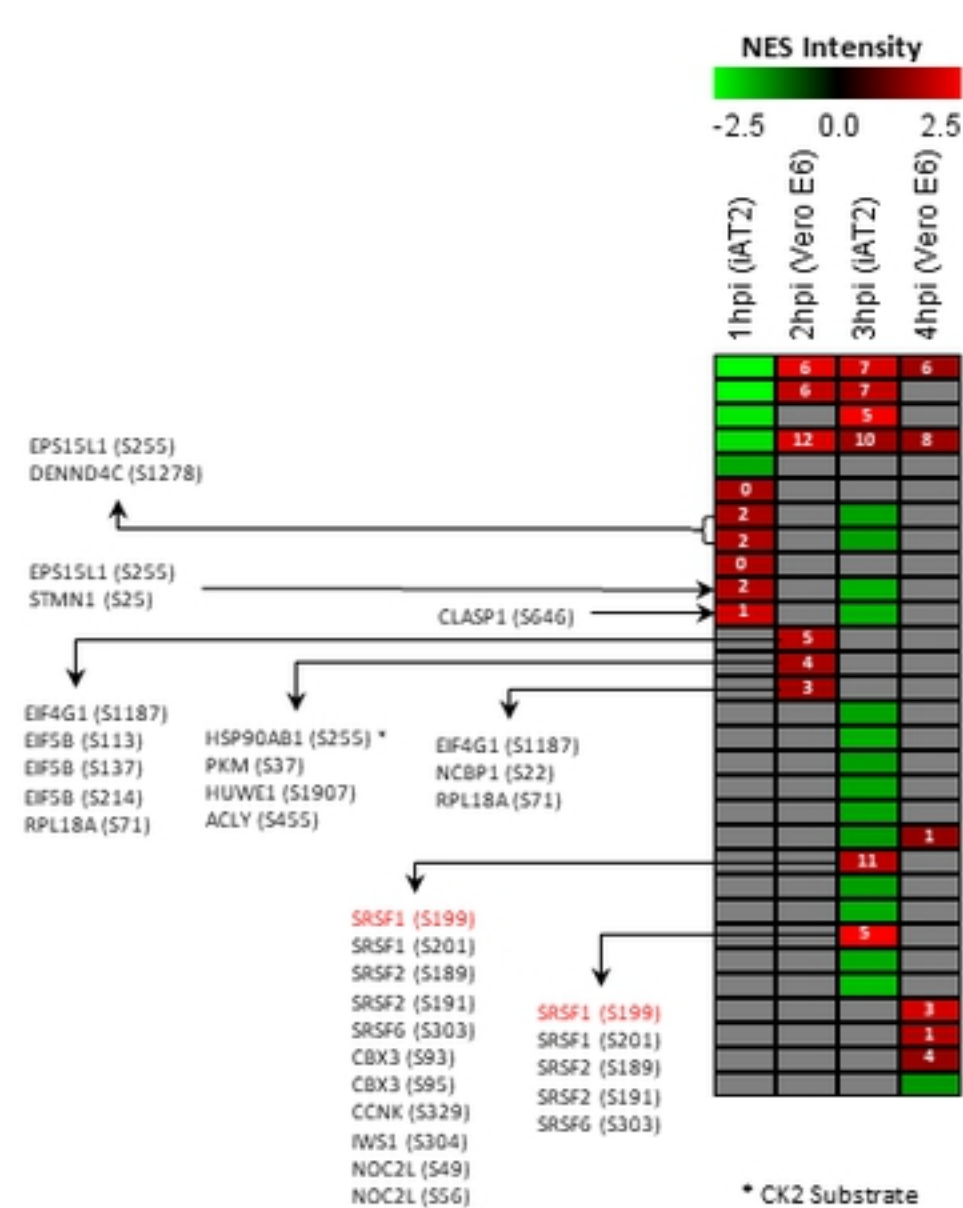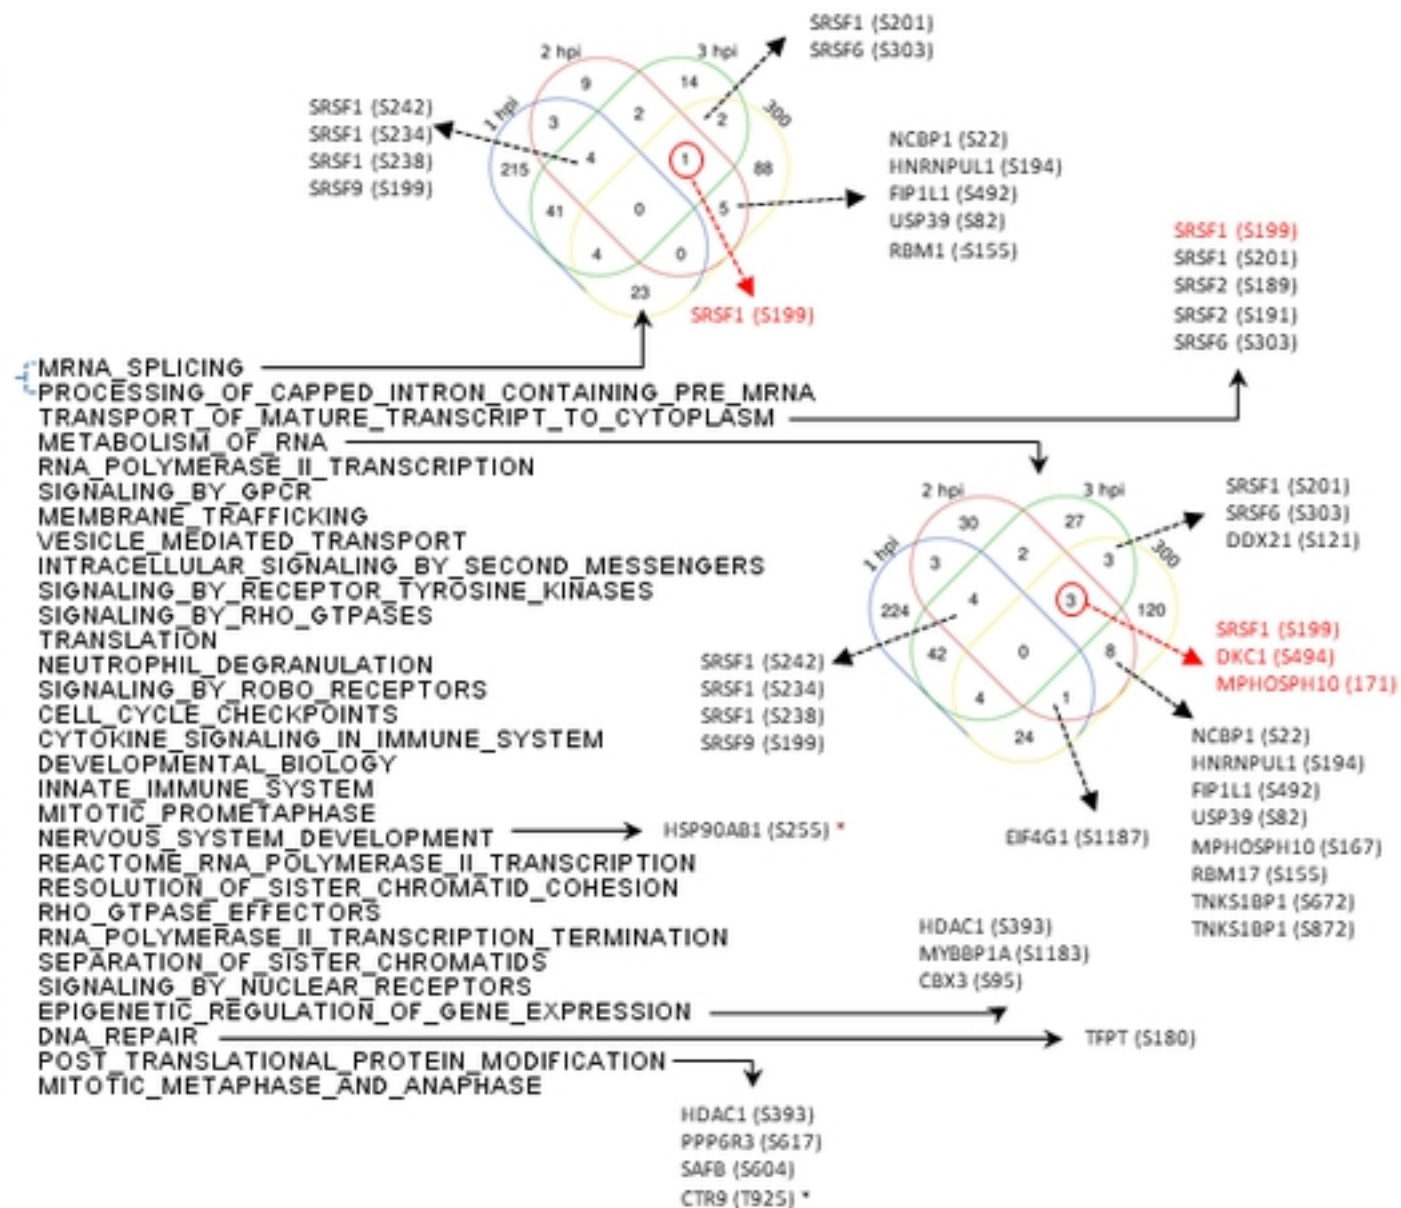

Figure

CSNK2A2 ( $\log_2$ FC Expression)

0.6  
0.4  
0.2  
0.0  
-0.2  
-0.4  
-0.6

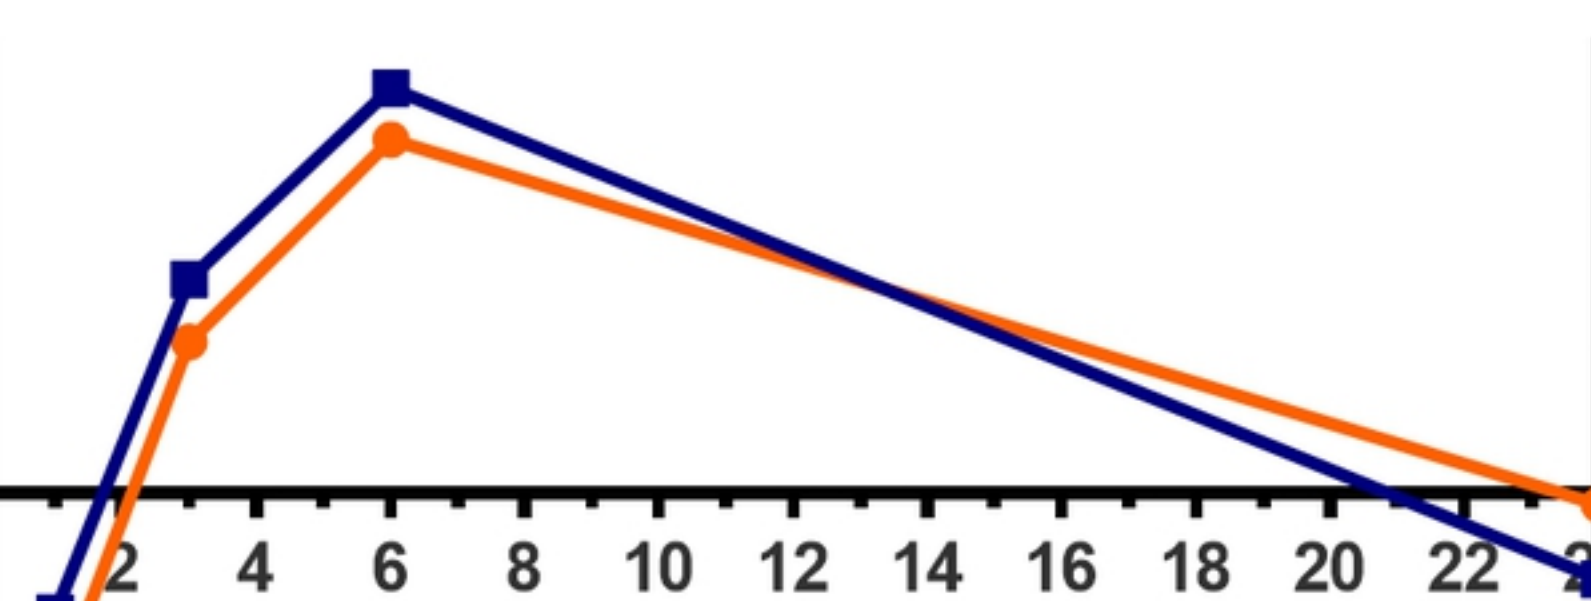

0.6  
0.4  
0.2  
0.0  
-0.2  
-0.4  
-0.6

SRPK1\_S51 ( $\log_2$ FC Phosphorylation)

Figure

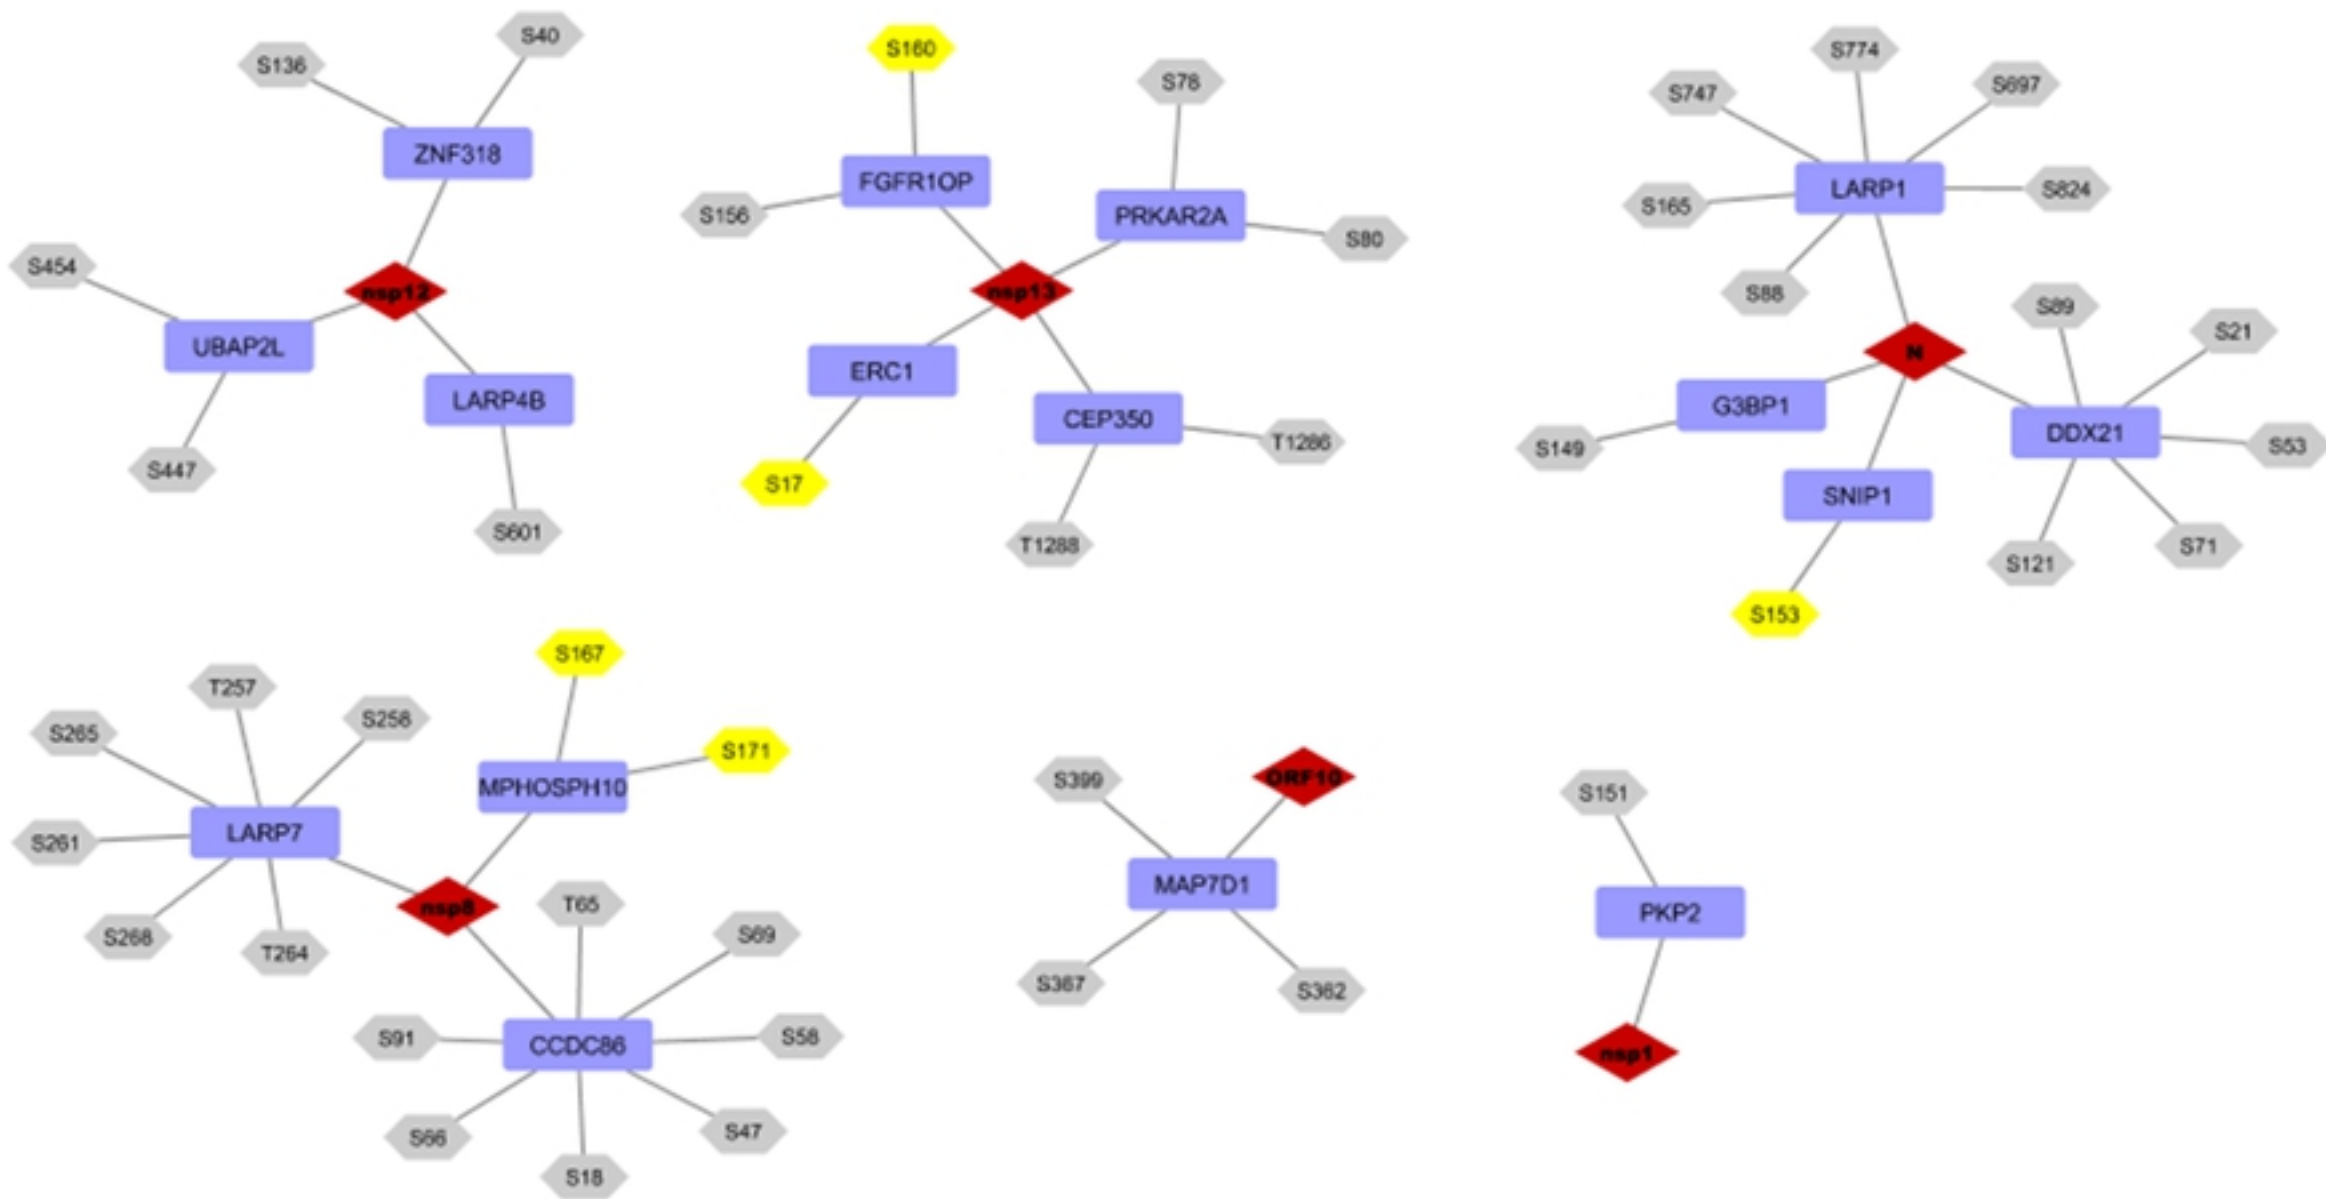

Figure

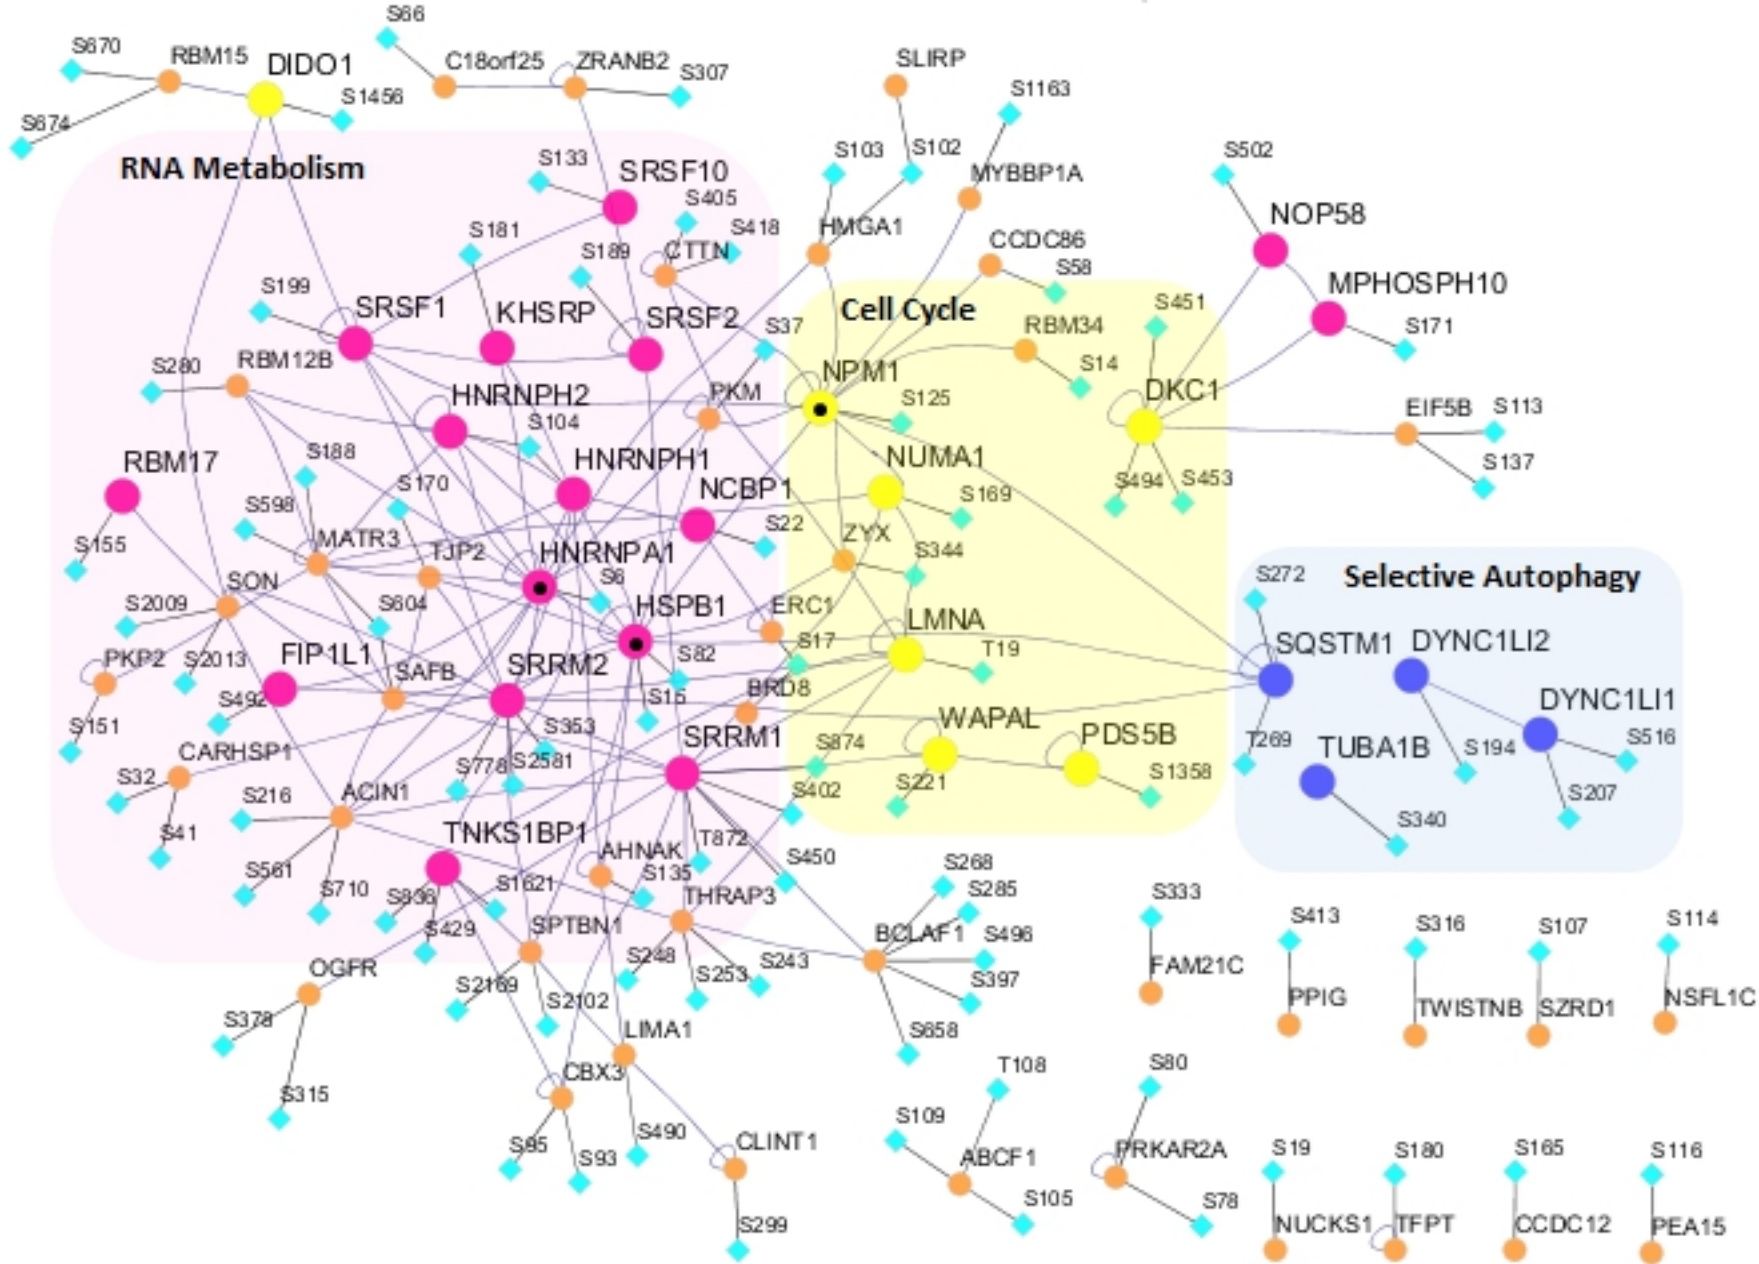

Figure

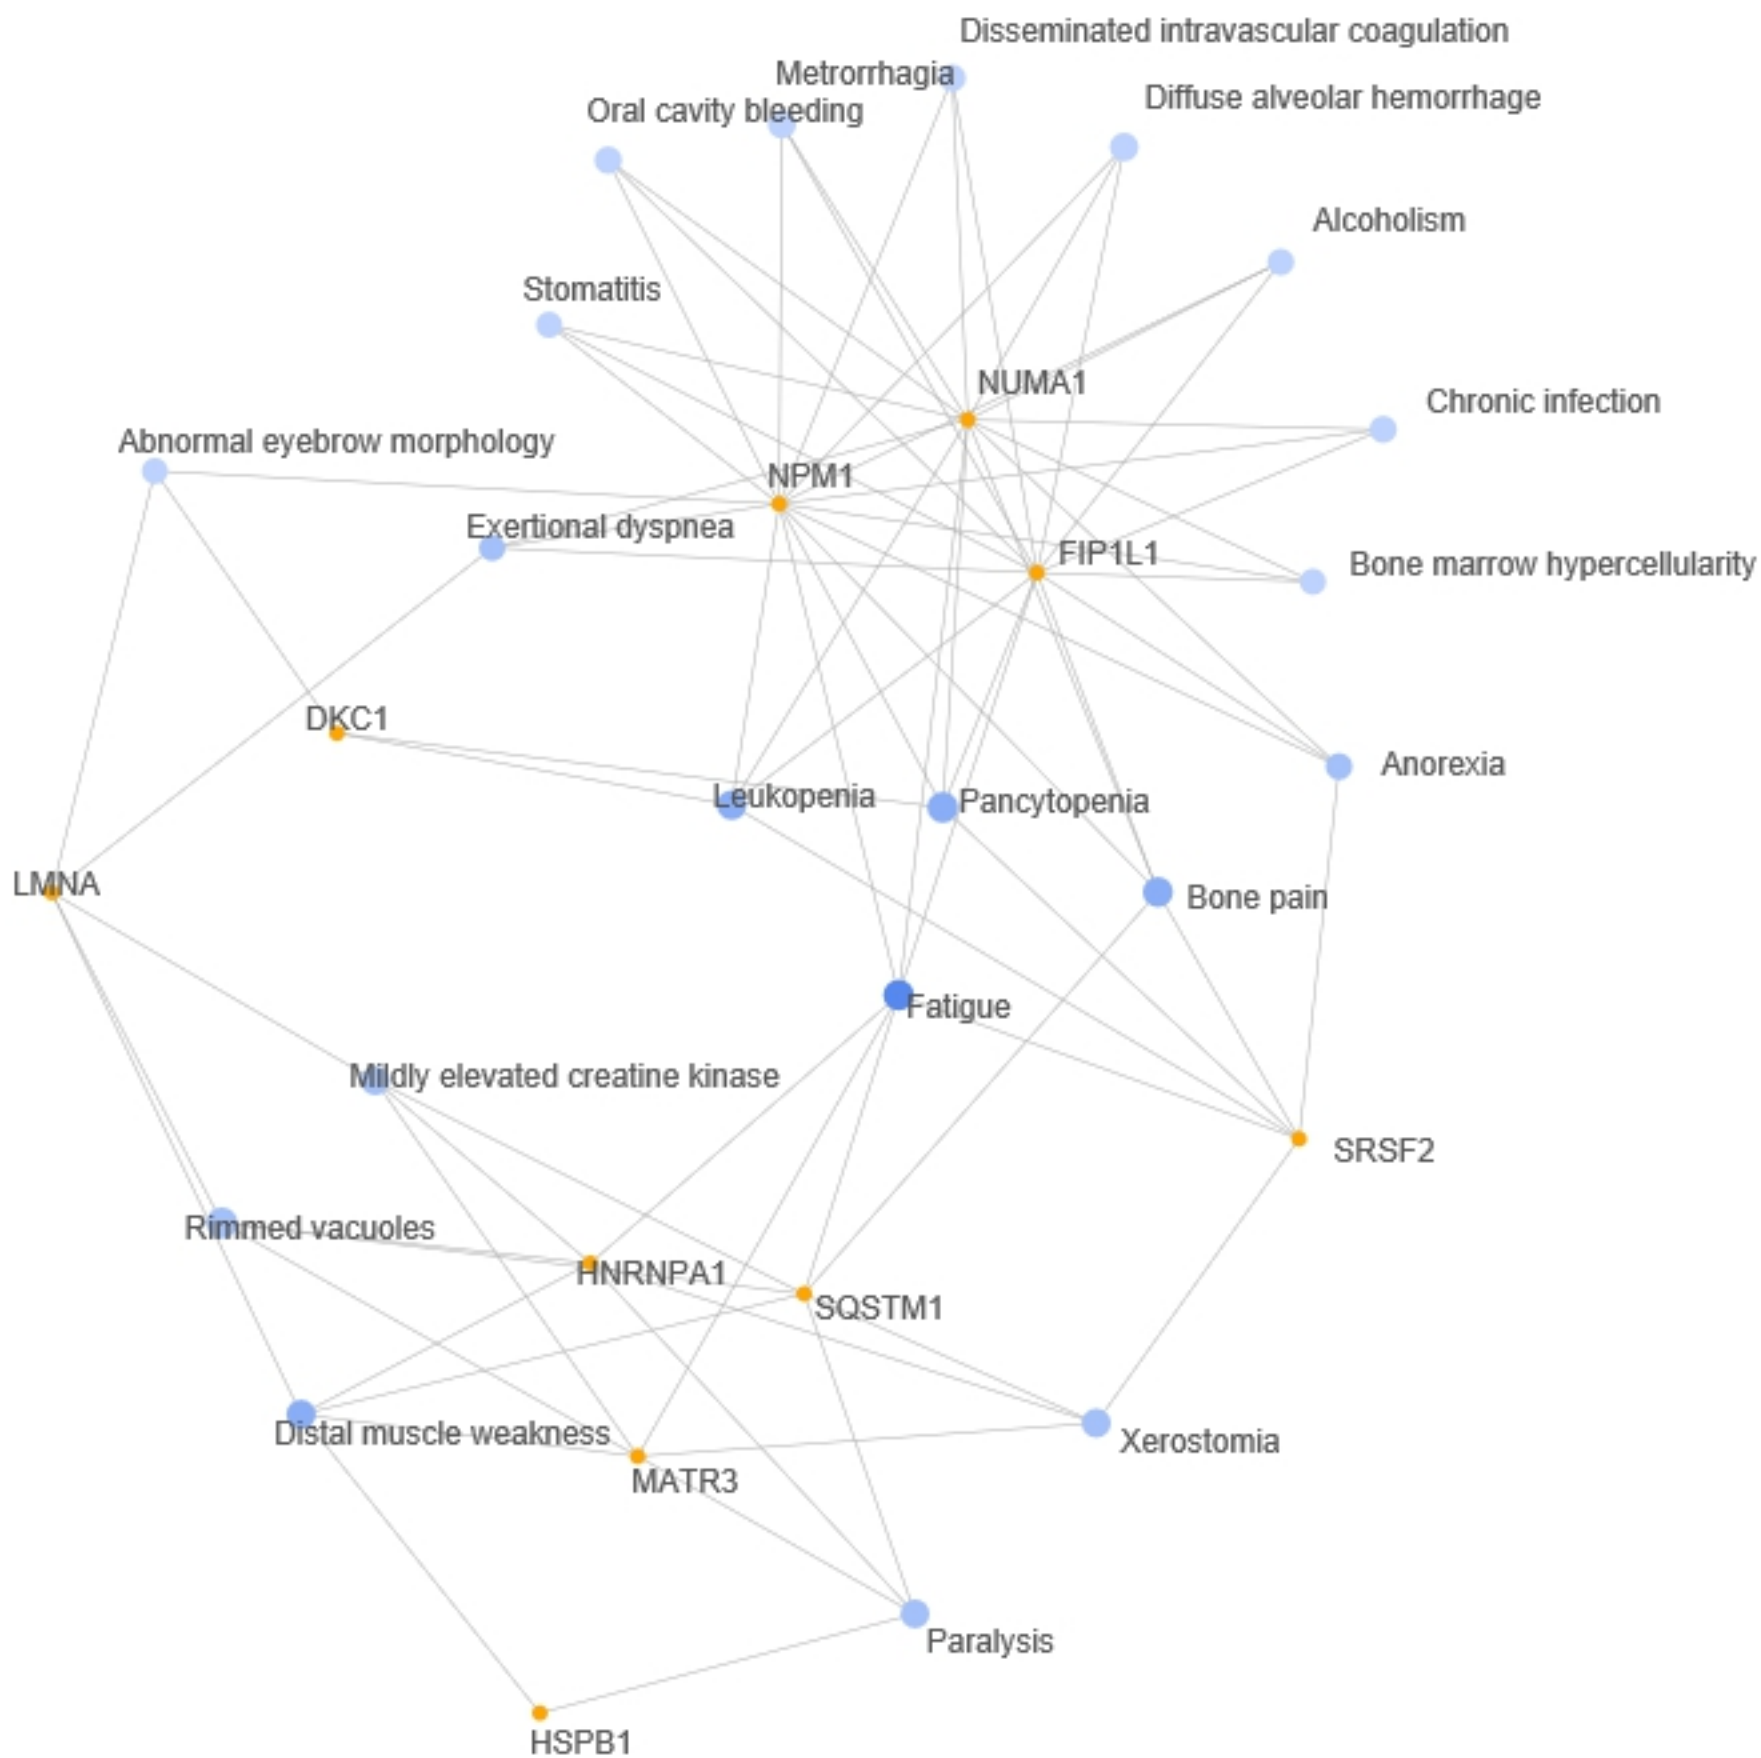

Figure
